# Supplementary material for: Identification of a ten-long noncoding RNA signature for predicting the survival and immune status of patients with bladder urothelial carcinoma based on the GEO database: a superior machine learning model
Source: Aging (Albany NY). 2021 Feb 17;13(5):6957–81. doi: 10.18632/aging.202553 (PMC7993680; doi:10.18632/aging.202553)
Supplement: Supplementary Table 1 [file aging-13-202553-s002.xls]

## Sheet: Sheet1
Supplementary Table 1. Out-of-bag importance values of the three lncRNAs.
	beta	HR (95% CI for HR)	wald.test	p.value	importance
ILMN_1884070	4.4	83 (5.2-1300)	9.8	0.0018	0.00715179
ILMN_1909784	3.2	24 (3.3-170)	9.9	0.0016	0.00687708
ILMN_1904054	1.9	6.8 (2.9-16)	19	1e-05	0.010009
ILMN_1807464	1.3	3.5 (1.5-8.4)	8.3	0.004	0.00159557
ILMN_1728403	1.2	3.5 (1.5-7.9)	8.8	0.003	0.00239412
ILMN_1665515	1.2	3.4 (1.5-7.9)	8	0.0046	0.000662941
ILMN_1910948	0.91	2.5 (1.3-4.9)	7	0.0083	0.00129887
ILMN_1656131	0.62	1.9 (1.4-2.5)	16	7.6e-05	0.00309133
ILMN_1813179	-0.39	0.68 (0.51-0.91)	6.7	0.0099	0.000683385
ILMN_2099858	-4.1	0.017 (0.00078-0.37)	6.7	0.0098	0.000914741
						ILMN_1910948	0.00129887
						ILMN_1728403	0.00239412
						ILMN_1909784	0.00687708
						ILMN_1656131	0.00309133
						ILMN_1813179	0.000683385
						ILMN_1807464	0.00159557
						ILMN_1904054	0.010009
						ILMN_1884070	0.00715179
						ILMN_1665515	0.000662941
						ILMN_2099858	0.000914741

## Sheet: Sheet2
ILMN_1910948	0.00129887
ILMN_1728403	0.00239412
ILMN_1909784	0.00687708
ILMN_1656131	0.00309133
ILMN_1813179	0.000683385
ILMN_1807464	0.00159557
ILMN_1904054	0.010009
ILMN_1884070	0.00715179
ILMN_1665515	0.000662941
ILMN_2099858	0.000914741
