# Supplementary material for: Identification of a ten-long noncoding RNA signature for predicting the survival and immune status of patients with bladder urothelial carcinoma based on the GEO database: a superior machine learning model
Source: Aging (Albany NY). 2021 Feb 17;13(5):6957–81. doi: 10.18632/aging.202553 (PMC7993680; doi:10.18632/aging.202553)
Supplement: Supplementary Table 2 [file aging-13-202553-s003.xlsx]

## Sheet: cox911
Supplementary Table 2. Results of univariate Cox regression analysis of urothelial carcinoma patients’ disease-specific survival in the GSE32894 training series (N=224).
	beta	HR (95% CI for HR)	wald.test	p.value
ILMN_1840923	5.4	220 (12-3900)	14	0.00023
ILMN_1861906	4.6	100 (3.3-3000)	7	0.0082
ILMN_1884070	4.4	83 (5.2-1300)	9.8	0.0018
ILMN_1843407	3.9	50 (0.91-2800)	3.6	0.056
ILMN_1887127	3.8	43 (1.7-1100)	5.3	0.022
ILMN_1887656	3.7	42 (1-1700)	3.9	0.049
ILMN_2089365	3.6	38 (2.1-700)	6	0.015
ILMN_1770269	3.5	32 (1.6-620)	5.2	0.022
ILMN_1843876	3.3	28 (1.4-560)	4.8	0.029
ILMN_1685399	3.3	26 (0.96-720)	3.8	0.053
ILMN_1909784	3.2	24 (3.3-170)	9.9	0.0016
ILMN_1839517	3.2	24 (2-290)	6.2	0.013
ILMN_1858341	3.1	22 (1.9-260)	6.1	0.014
ILMN_1674442	3.1	22 (1.5-300)	5.2	0.022
ILMN_1878952	3	21 (0.77-550)	3.2	0.071
ILMN_1773193	2.9	19 (1.7-210)	5.6	0.018
ILMN_1862713	2.9	18 (1-300)	4	0.046
ILMN_2121848	2.9	18 (1.7-190)	5.8	0.016
ILMN_1858963	2.9	18 (1.2-280)	4.4	0.037
ILMN_1900758	2.8	16 (2.1-120)	7.2	0.0071
ILMN_1818125	2.8	16 (1.4-180)	4.9	0.028
ILMN_1831073	2.8	16 (1.1-230)	4.2	0.041
ILMN_1852267	2.7	15 (1.6-140)	5.6	0.018
ILMN_1888508	2.7	15 (1.6-130)	5.8	0.016
ILMN_1860667	2.7	15 (1.5-150)	5.3	0.021
ILMN_1665876	2.7	15 (1.3-190)	4.6	0.032
ILMN_1662743	2.7	15 (0.4-600)	2.2	0.14
ILMN_1907589	2.7	14 (1.8-110)	6.4	0.011
ILMN_1891506	2.7	14 (1.7-120)	5.9	0.015
ILMN_1787555	2.7	14 (0.61-340)	2.7	0.098
ILMN_1695080	2.6	13 (2.5-71)	9.3	0.0023
ILMN_1895686	2.6	13 (1.7-100)	6	0.014
ILMN_1776956	2.6	13 (0.8-210)	3.2	0.071
ILMN_1686463	2.6	13 (0.74-230)	3.1	0.079
ILMN_1881514	2.5	12 (3.9-36)	19	1.2e-05
ILMN_1879150	2.5	12 (0.89-160)	3.5	0.061
ILMN_1690382	2.5	12 (0.87-160)	3.4	0.063
ILMN_1724608	2.4	11 (2.5-48)	10	0.0015
ILMN_1810330	2.4	11 (1.9-63)	7	0.0081
ILMN_1914025	2.4	11 (1.5-72)	5.8	0.016
ILMN_1854518	2.4	11 (0.54-230)	2.4	0.12
ILMN_1893339	2.4	11 (0.28-440)	1.7	0.2
ILMN_1896697	2.3	9.9 (0.62-160)	2.6	0.1
ILMN_1864939	2.3	9.8 (0.26-370)	1.5	0.22
ILMN_1776659	2.3	10 (0.72-150)	3	0.086
ILMN_1686530	2.2	9.4 (2.4-36)	11	0.0012
ILMN_1887731	2.2	8.9 (1-78)	3.8	0.05
ILMN_1855566	2.2	8.9 (0.38-210)	1.8	0.17
ILMN_1661715	2.1	8.5 (0.74-98)	3	0.085
ILMN_1870199	2.1	8.1 (0.52-130)	2.2	0.13
ILMN_1777439	2	7.7 (1.6-37)	6.4	0.011
ILMN_1894877	2	7.6 (0.29-200)	1.5	0.22
ILMN_1659209	2	7.5 (1.3-44)	5	0.025
ILMN_1665985	2	7.3 (0.79-67)	3.1	0.079
ILMN_1847602	2	7.2 (0.72-72)	2.8	0.094
ILMN_1893680	1.9	6.9 (1.6-30)	6.5	0.011
ILMN_1904054	1.9	6.8 (2.9-16)	19	1e-05
ILMN_1760222	1.9	6.8 (0.27-170)	1.4	0.24
ILMN_1870589	1.9	6.8 (0.22-210)	1.2	0.27
ILMN_1854945	1.9	6.7 (0.96-46)	3.7	0.055
ILMN_1855062	1.9	6.7 (0.78-58)	3	0.083
ILMN_1890097	1.9	6.7 (0.13-350)	0.88	0.35
ILMN_1880113	1.9	6.4 (1.3-32)	5.3	0.022
ILMN_1865312	1.9	6.4 (0.48-87)	2	0.16
ILMN_1830153	1.9	6.4 (0.26-160)	1.3	0.26
ILMN_1902948	1.9	6.4 (0.21-200)	1.1	0.29
ILMN_2050434	1.8	6.3 (1.5-26)	6.5	0.011
ILMN_1683809	1.8	6.3 (0.35-120)	1.6	0.21
ILMN_1897267	1.8	6.3 (0.3-140)	1.4	0.24
ILMN_1827984	1.8	6.3 (0.25-160)	1.2	0.26
ILMN_1818536	1.8	6.1 (0.69-54)	2.6	0.1
ILMN_1878881	1.8	6 (0.68-54)	2.6	0.11
ILMN_1907306	1.8	6 (0.67-55)	2.6	0.11
ILMN_1832119	1.8	5.8 (0.61-55)	2.3	0.13
ILMN_1880941	1.7	5.7 (1-31)	4.1	0.044
ILMN_1853040	1.7	5.7 (0.51-63)	2	0.16
ILMN_1803241	1.7	5.7 (0.37-89)	1.6	0.21
ILMN_1723732	1.7	5.6 (1.2-27)	4.6	0.033
ILMN_1890485	1.7	5.6 (0.88-36)	3.3	0.068
ILMN_1829388	1.7	5.5 (0.48-62)	1.9	0.17
ILMN_1833744	1.7	5.5 (0.23-130)	1.1	0.29
ILMN_1878295	1.7	5.3 (0.9-31)	3.4	0.065
ILMN_1750288	1.7	5.3 (0.064-440)	0.55	0.46
ILMN_1830334	1.7	5.2 (0.46-59)	1.8	0.18
ILMN_2163187	1.6	5.2 (0.42-64)	1.6	0.2
ILMN_1653286	1.6	5.2 (0.39-69)	1.6	0.21
ILMN_1732000	1.6	5.1 (1.6-16)	7.8	0.0053
ILMN_1743040	1.6	5.1 (0.56-47)	2.1	0.15
ILMN_1855432	1.6	5.1 (0.38-70)	1.5	0.22
ILMN_1887987	1.6	5.1 (0.37-70)	1.5	0.22
ILMN_1695485	1.6	5 (2.8-8.8)	30	4.4e-08
ILMN_1832665	1.6	5 (0.3-82)	1.3	0.26
ILMN_1673158	1.6	5 (0.17-150)	0.87	0.35
ILMN_1910321	1.6	4.9 (0.9-27)	3.4	0.066
ILMN_1782399	1.6	4.9 (0.54-45)	2	0.16
ILMN_2142255	1.6	4.9 (0.24-97)	1.1	0.3
ILMN_1880341	1.6	4.7 (0.66-34)	2.4	0.12
ILMN_1853599	1.6	4.7 (0.52-43)	1.9	0.17
ILMN_1894521	1.5	4.7 (1.2-18)	4.9	0.027
ILMN_1759374	1.5	4.7 (0.47-46)	1.7	0.19
ILMN_1913782	1.5	4.7 (0.16-140)	0.8	0.37
ILMN_1881313	1.5	4.6 (1.2-17)	5.2	0.022
ILMN_1836375	1.5	4.5 (0.55-38)	2	0.16
ILMN_1875735	1.5	4.5 (0.47-43)	1.7	0.19
ILMN_1884277	1.5	4.5 (0.27-75)	1.1	0.29
ILMN_2055396	1.5	4.5 (0.073-270)	0.51	0.48
ILMN_1876852	1.5	4.4 (0.82-23)	3	0.083
ILMN_1910146	1.5	4.4 (0.81-24)	2.9	0.087
ILMN_1892340	1.5	4.3 (0.64-28)	2.3	0.13
ILMN_1899417	1.5	4.3 (0.19-96)	0.84	0.36
ILMN_1864247	1.4	4.3 (0.43-42)	1.5	0.22
ILMN_1843388	1.4	4.1 (1.4-12)	6.3	0.012
ILMN_1824016	1.4	4.1 (1.1-16)	4.2	0.04
ILMN_1666371	1.4	4.1 (0.67-26)	2.3	0.13
ILMN_1661461	1.4	4.1 (0.51-34)	1.8	0.19
ILMN_1665824	1.4	4.1 (0.46-37)	1.6	0.21
ILMN_1849012	1.4	4.1 (0.38-44)	1.4	0.25
ILMN_1740942	1.4	4.1 (0.24-68)	0.96	0.33
ILMN_1831993	1.4	4 (0.26-60)	0.99	0.32
ILMN_1744832	1.4	4 (0.25-63)	0.96	0.33
ILMN_1823752	1.4	3.9 (0.74-20)	2.6	0.11
ILMN_1705207	1.4	3.9 (0.32-47)	1.1	0.28
ILMN_1840253	1.3	3.8 (0.48-31)	1.6	0.2
ILMN_1722916	1.3	3.7 (0.28-50)	0.99	0.32
ILMN_1848680	1.3	3.7 (0.1-130)	0.51	0.48
ILMN_1719963	1.3	3.7 (0.096-140)	0.49	0.48
ILMN_1725157	1.3	3.6 (0.53-25)	1.7	0.19
ILMN_1732955	1.3	3.6 (0.28-47)	0.95	0.33
ILMN_1661523	1.3	3.6 (0.18-72)	0.7	0.4
ILMN_1807464	1.3	3.5 (1.5-8.4)	8.3	0.004
ILMN_1847529	1.3	3.5 (0.27-45)	0.93	0.33
ILMN_1827050	1.3	3.5 (0.25-50)	0.86	0.35
ILMN_1728403	1.2	3.5 (1.5-7.9)	8.8	0.003
ILMN_1830598	1.2	3.4 (1.9-6.3)	15	8.4e-05
ILMN_1665515	1.2	3.4 (1.5-7.9)	8	0.0046
ILMN_1884793	1.2	3.4 (0.28-41)	0.94	0.33
ILMN_1666617	1.2	3.4 (0.24-47)	0.8	0.37
ILMN_1823682	1.2	3.4 (0.21-56)	0.75	0.39
ILMN_1697872	1.2	3.3 (1.3-9)	5.8	0.016
ILMN_1700719	1.2	3.3 (0.89-12)	3.2	0.074
ILMN_1694168	1.2	3.3 (0.8-14)	2.7	0.098
ILMN_1873048	1.2	3.2 (0.13-78)	0.5	0.48
ILMN_1883844	1.1	3.1 (0.95-10)	3.5	0.062
ILMN_1767535	1.1	3.1 (0.92-10)	3.3	0.069
ILMN_1864370	1.1	3.1 (0.45-21)	1.3	0.25
ILMN_1886877	1.1	3.1 (0.061-160)	0.32	0.57
ILMN_1878670	1.1	3 (0.55-16)	1.6	0.2
ILMN_1881858	1.1	3 (0.4-23)	1.1	0.29
ILMN_1874933	1.1	3 (0.38-23)	1.1	0.3
ILMN_1824539	1.1	3 (0.37-23)	1	0.31
ILMN_1660839	1.1	2.9 (1.4-6.3)	7.5	0.0061
ILMN_1663081	1.1	2.9 (1.4-5.8)	8.4	0.0037
ILMN_1728115	1.1	2.9 (0.3-27)	0.84	0.36
ILMN_1833968	1.1	2.9 (0.26-33)	0.77	0.38
ILMN_1894539	1.1	2.9 (0.14-61)	0.46	0.5
ILMN_1827492	1.1	2.9 (0.097-85)	0.37	0.54
ILMN_1733191	1	2.9 (0.17-48)	0.53	0.47
ILMN_1665207	1	2.8 (1.6-5)	12	0.00054
ILMN_1723910	1	2.8 (1.5-5.1)	12	0.00068
ILMN_1849318	1	2.8 (1.5-5.1)	11	0.00071
ILMN_1896061	1	2.8 (0.81-9.5)	2.6	0.11
ILMN_1829664	1	2.8 (0.31-25)	0.84	0.36
ILMN_1866482	1	2.8 (0.28-27)	0.75	0.38
ILMN_1682463	1	2.7 (0.96-7.8)	3.6	0.059
ILMN_1691228	1	2.7 (0.87-8.4)	3	0.085
ILMN_1656767	1	2.7 (0.37-20)	0.95	0.33
ILMN_1670352	1	2.7 (0.2-38)	0.56	0.45
ILMN_1794866	0.99	2.7 (0.65-11)	1.9	0.17
ILMN_1852522	0.98	2.7 (1.1-6.3)	4.9	0.027
ILMN_1762545	0.98	2.7 (0.7-10)	2.1	0.15
ILMN_1726856	0.97	2.6 (1-6.8)	4.1	0.043
ILMN_1688228	0.97	2.6 (0.65-11)	1.8	0.17
ILMN_1837631	0.97	2.6 (0.27-25)	0.7	0.4
ILMN_1839926	0.97	2.6 (0.26-27)	0.68	0.41
ILMN_1666706	0.96	2.6 (1-6.6)	4.1	0.044
ILMN_1685465	0.96	2.6 (0.85-8)	2.8	0.093
ILMN_1912611	0.96	2.6 (0.38-18)	0.96	0.33
ILMN_1867071	0.96	2.6 (0.37-19)	0.92	0.34
ILMN_1746292	0.96	2.6 (0.26-26)	0.67	0.41
ILMN_1657148	0.95	2.6 (0.78-8.6)	2.4	0.12
ILMN_1778382	0.95	2.6 (0.23-28)	0.6	0.44
ILMN_1826101	0.93	2.5 (0.63-10)	1.7	0.19
ILMN_1875096	0.92	2.5 (1-6)	4.3	0.039
ILMN_1691966	0.92	2.5 (1.7-3.7)	22	2.3e-06
ILMN_1705656	0.92	2.5 (0.095-67)	0.3	0.58
ILMN_1910948	0.91	2.5 (1.3-4.9)	7	0.0083
ILMN_1860559	0.91	2.5 (0.3-20)	0.71	0.4
ILMN_1911599	0.91	2.5 (0.23-26)	0.57	0.45
ILMN_1799204	0.9	2.5 (0.14-43)	0.38	0.54
ILMN_1821350	0.9	2.4 (0.16-37)	0.42	0.52
ILMN_1820251	0.87	2.4 (0.38-15)	0.87	0.35
ILMN_2221808	0.86	2.4 (1.2-4.6)	6.4	0.012
ILMN_1894911	0.86	2.4 (1.1-5.2)	4.6	0.032
ILMN_1685305	0.86	2.4 (0.4-14)	0.89	0.35
ILMN_1678674	0.86	2.4 (0.35-16)	0.77	0.38
ILMN_1676077	0.85	2.3 (0.46-12)	1	0.3
ILMN_1878027	0.85	2.3 (0.43-13)	0.96	0.33
ILMN_1701645	0.85	2.3 (0.21-26)	0.48	0.49
ILMN_1832385	0.85	2.3 (0.1-54)	0.28	0.6
ILMN_1902000	0.85	2.3 (0.14-38)	0.36	0.55
ILMN_1910641	0.85	2.3 (0.048-110)	0.18	0.67
ILMN_1668353	0.84	2.3 (0.32-17)	0.68	0.41
ILMN_1668671	0.83	2.3 (0.17-32)	0.38	0.54
ILMN_1746436	0.81	2.3 (0.99-5.1)	3.8	0.053
ILMN_1663893	0.8	2.2 (1.1-4.4)	5.2	0.022
ILMN_1845776	0.79	2.2 (0.54-9)	1.2	0.27
ILMN_1783547	0.79	2.2 (0.38-13)	0.78	0.38
ILMN_1720469	0.79	2.2 (0.098-50)	0.25	0.62
ILMN_1876400	0.78	2.2 (0.57-8.4)	1.3	0.26
ILMN_1737806	0.78	2.2 (0.42-11)	0.87	0.35
ILMN_1768901	0.77	2.2 (0.17-28)	0.35	0.56
ILMN_1680799	0.77	2.2 (0.17-27)	0.35	0.55
ILMN_1916786	0.77	2.2 (0.12-40)	0.27	0.6
ILMN_1716431	0.76	2.1 (0.65-7.1)	1.6	0.21
ILMN_2143795	0.75	2.1 (1.5-3)	19	1.3e-05
ILMN_1749083	0.75	2.1 (0.74-6.1)	1.9	0.16
ILMN_1835925	0.75	2.1 (0.67-6.7)	1.6	0.2
ILMN_1845855	0.75	2.1 (0.29-16)	0.55	0.46
ILMN_1848652	0.75	2.1 (0.15-30)	0.31	0.58
ILMN_1887145	0.75	2.1 (0.12-37)	0.26	0.61
ILMN_1723256	0.74	2.1 (0.16-28)	0.32	0.57
ILMN_1821954	0.74	2.1 (0.087-51)	0.21	0.65
ILMN_1807093	0.73	2.1 (1-4.3)	3.8	0.05
ILMN_1841999	0.73	2.1 (0.52-8.3)	1.1	0.3
ILMN_1699188	0.72	2 (0.52-8.1)	1	0.31
ILMN_1784879	0.72	2 (0.51-8.2)	1	0.31
ILMN_1826692	0.71	2 (0.12-36)	0.23	0.63
ILMN_1690064	0.7	2 (1.3-3.1)	9.8	0.0017
ILMN_1668442	0.7	2 (0.52-7.8)	1	0.31
ILMN_1901841	0.7	2 (0.33-12)	0.57	0.45
ILMN_1696701	0.69	2 (1.2-3.4)	6.6	0.01
ILMN_1902929	0.69	2 (0.96-4.2)	3.4	0.065
ILMN_2320480	0.69	2 (0.9-4.4)	2.9	0.089
ILMN_1840175	0.69	2 (0.38-10)	0.66	0.42
ILMN_1900307	0.69	2 (0.1-39)	0.21	0.65
ILMN_1704916	0.68	2 (0.16-24)	0.28	0.6
ILMN_1744906	0.68	2 (0.16-24)	0.28	0.6
ILMN_1712588	0.68	2 (0.11-34)	0.22	0.64
ILMN_1701314	0.67	2 (1.1-3.5)	5	0.026
ILMN_1893686	0.66	1.9 (0.33-12)	0.54	0.46
ILMN_1889624	0.65	1.9 (0.47-7.9)	0.81	0.37
ILMN_1699113	0.65	1.9 (0.46-8.1)	0.79	0.37
ILMN_1775686	0.65	1.9 (0.2-18)	0.32	0.57
ILMN_1726153	0.64	1.9 (1.3-2.7)	13	0.00036
ILMN_1770055	0.64	1.9 (1.1-3.3)	4.8	0.028
ILMN_1702226	0.64	1.9 (0.91-3.9)	2.9	0.09
ILMN_1896149	0.64	1.9 (0.58-6.3)	1.1	0.29
ILMN_1827623	0.64	1.9 (0.3-12)	0.47	0.49
ILMN_1678827	0.64	1.9 (0.27-13)	0.41	0.52
ILMN_2211724	0.63	1.9 (1-3.5)	4.2	0.041
ILMN_1786168	0.63	1.9 (0.96-3.7)	3.3	0.067
ILMN_1773553	0.62	1.9 (1-3.4)	4	0.046
ILMN_1656131	0.62	1.9 (1.4-2.5)	16	7.6e-05
ILMN_1815114	0.62	1.9 (1.1-3.2)	4.9	0.027
ILMN_1775442	0.62	1.9 (0.32-11)	0.47	0.49
ILMN_1889811	0.62	1.9 (0.26-13)	0.39	0.53
ILMN_1664969	0.62	1.8 (0.49-7)	0.82	0.37
ILMN_1783743	0.61	1.8 (0.84-4)	2.3	0.13
ILMN_1841019	0.61	1.8 (0.51-6.7)	0.85	0.36
ILMN_1692589	0.61	1.8 (0.31-11)	0.46	0.5
ILMN_1829989	0.59	1.8 (0.88-3.6)	2.6	0.11
ILMN_1883559	0.59	1.8 (0.25-13)	0.35	0.56
ILMN_1881446	0.59	1.8 (0.12-26)	0.19	0.66
ILMN_1795835	0.58	1.8 (1.2-2.6)	9.9	0.0016
ILMN_1662880	0.58	1.8 (0.68-4.6)	1.4	0.24
ILMN_1682664	0.58	1.8 (0.29-11)	0.39	0.53
ILMN_1806892	0.57	1.8 (0.099-31)	0.15	0.7
ILMN_1754114	0.56	1.7 (0.74-4.1)	1.6	0.2
ILMN_1899338	0.56	1.7 (0.41-7.5)	0.57	0.45
ILMN_1859743	0.56	1.7 (0.13-23)	0.18	0.67
ILMN_1669122	0.55	1.7 (0.86-3.5)	2.4	0.12
ILMN_1761266	0.55	1.7 (0.42-7.2)	0.58	0.45
ILMN_1847332	0.55	1.7 (0.026-120)	0.07	0.8
ILMN_1881775	0.54	1.7 (0.15-19)	0.19	0.66
ILMN_1912834	0.54	1.7 (0.072-41)	0.11	0.74
ILMN_1815635	0.53	1.7 (0.76-3.8)	1.7	0.19
ILMN_1674648	0.53	1.7 (0.41-7)	0.53	0.46
ILMN_1692871	0.53	1.7 (0.25-12)	0.29	0.59
ILMN_1903528	0.53	1.7 (0.04-73)	0.08	0.78
ILMN_1849228	0.52	1.7 (0.82-3.5)	2	0.16
ILMN_1673743	0.52	1.7 (0.16-18)	0.18	0.67
ILMN_1880700	0.52	1.7 (0.062-46)	0.1	0.76
ILMN_1910334	0.51	1.7 (0.58-4.8)	0.88	0.35
ILMN_1897299	0.51	1.7 (0.088-31)	0.11	0.73
ILMN_1876629	0.51	1.7 (0.012-220)	0.04	0.84
ILMN_1770994	0.5	1.6 (0.89-3)	2.5	0.11
ILMN_1717371	0.5	1.6 (0.83-3.3)	2	0.15
ILMN_1825421	0.5	1.6 (0.35-7.7)	0.4	0.53
ILMN_1816080	0.5	1.6 (0.081-33)	0.1	0.75
ILMN_1778456	0.49	1.6 (0.34-7.9)	0.37	0.54
ILMN_1810319	0.49	1.6 (0.079-34)	0.1	0.75
ILMN_1671149	0.48	1.6 (1.2-2.2)	11	0.0012
ILMN_2043918	0.48	1.6 (0.9-2.9)	2.6	0.11
ILMN_1743195	0.48	1.6 (0.29-8.9)	0.3	0.59
ILMN_1903425	0.48	1.6 (0.049-53)	0.07	0.79
ILMN_1790751	0.47	1.6 (0.71-3.6)	1.3	0.26
ILMN_1825159	0.47	1.6 (0.22-12)	0.21	0.64
ILMN_1716682	0.46	1.6 (0.28-8.9)	0.27	0.6
ILMN_1899034	0.46	1.6 (0.26-9.6)	0.26	0.61
ILMN_1700280	0.46	1.6 (0.037-68)	0.06	0.81
ILMN_1874506	0.45	1.6 (0.89-2.8)	2.5	0.12
ILMN_1676731	0.45	1.6 (0.67-3.7)	1.1	0.3
ILMN_1869781	0.45	1.6 (0.29-8.6)	0.27	0.61
ILMN_1886050	0.45	1.6 (0.096-26)	0.1	0.75
ILMN_1796074	0.44	1.6 (1.1-2.2)	5.9	0.015
ILMN_1901305	0.44	1.6 (0.85-2.8)	2.1	0.15
ILMN_1729269	0.44	1.6 (0.71-3.4)	1.2	0.27
ILMN_1688246	0.44	1.6 (0.68-3.6)	1.1	0.29
ILMN_1694431	0.44	1.6 (0.52-4.6)	0.63	0.43
ILMN_1826572	0.44	1.6 (0.26-9.2)	0.23	0.63
ILMN_1700034	0.44	1.6 (0.21-12)	0.18	0.67
ILMN_1888740	0.44	1.6 (0.054-45)	0.07	0.8
ILMN_2134381	0.43	1.5 (0.99-2.4)	3.7	0.055
ILMN_1696038	0.43	1.5 (0.7-3.4)	1.1	0.29
ILMN_1719280	0.43	1.5 (0.11-21)	0.1	0.75
ILMN_1860748	0.43	1.5 (0.031-78)	0.05	0.83
ILMN_1882953	0.42	1.5 (0.75-3.1)	1.4	0.24
ILMN_1902986	0.42	1.5 (0.081-29)	0.08	0.78
ILMN_1904619	0.41	1.5 (0.53-4.3)	0.59	0.44
ILMN_1864157	0.41	1.5 (0.33-6.9)	0.29	0.59
ILMN_1680902	0.41	1.5 (0.29-7.7)	0.24	0.62
ILMN_1874577	0.41	1.5 (0.25-8.9)	0.2	0.65
ILMN_1711772	0.41	1.5 (0.15-15)	0.12	0.72
ILMN_1830606	0.41	1.5 (0.084-27)	0.08	0.78
ILMN_1674782	0.4	1.5 (1.1-2)	8.2	0.0042
ILMN_1690703	0.4	1.5 (0.99-2.2)	3.7	0.054
ILMN_1655961	0.4	1.5 (0.99-2.2)	3.7	0.055
ILMN_1882500	0.4	1.5 (0.33-6.7)	0.28	0.6
ILMN_2067682	0.39	1.5 (0.64-3.4)	0.84	0.36
ILMN_1775053	0.39	1.5 (0.1-21)	0.08	0.77
ILMN_1909716	0.39	1.5 (0.11-21)	0.09	0.77
ILMN_1782178	0.38	1.5 (0.85-2.5)	1.9	0.17
ILMN_1909142	0.38	1.5 (0.27-8)	0.19	0.66
ILMN_2065822	0.37	1.5 (0.84-2.5)	1.8	0.18
ILMN_1876039	0.37	1.5 (0.074-28)	0.06	0.81
ILMN_1694182	0.37	1.5 (0.049-43)	0.05	0.83
ILMN_1813055	0.37	1.4 (0.59-3.5)	0.66	0.42
ILMN_1882569	0.37	1.4 (0.35-6)	0.26	0.61
ILMN_2061435	0.36	1.4 (1.1-1.8)	9.8	0.0017
ILMN_1714176	0.36	1.4 (0.56-3.7)	0.55	0.46
ILMN_1722133	0.36	1.4 (0.33-6.3)	0.23	0.63
ILMN_1898195	0.36	1.4 (0.28-7.3)	0.19	0.66
ILMN_1915527	0.36	1.4 (0.22-9.2)	0.15	0.7
ILMN_1709314	0.36	1.4 (0.11-18)	0.08	0.78
ILMN_1673409	0.35	1.4 (0.99-2)	3.7	0.055
ILMN_1707491	0.35	1.4 (0.85-2.3)	1.8	0.18
ILMN_1660754	0.35	1.4 (0.67-3)	0.83	0.36
ILMN_1884723	0.35	1.4 (0.67-3)	0.85	0.36
ILMN_1848281	0.35	1.4 (0.087-23)	0.06	0.81
ILMN_1666165	0.35	1.4 (0.038-52)	0.04	0.85
ILMN_1806862	0.34	1.4 (0.68-2.9)	0.84	0.36
ILMN_1891901	0.34	1.4 (0.19-11)	0.11	0.74
ILMN_1854472	0.34	1.4 (0.19-10)	0.11	0.74
ILMN_1666825	0.33	1.4 (0.38-5.1)	0.24	0.62
ILMN_1897886	0.33	1.4 (0.23-8.4)	0.13	0.72
ILMN_1784493	0.33	1.4 (0.081-24)	0.05	0.82
ILMN_1906397	0.32	1.4 (0.21-9)	0.11	0.74
ILMN_1907334	0.32	1.4 (0.026-73)	0.02	0.88
ILMN_1865056	0.31	1.4 (0.82-2.3)	1.4	0.23
ILMN_1688772	0.31	1.4 (0.75-2.4)	1	0.31
ILMN_2096031	0.31	1.4 (0.42-4.4)	0.26	0.61
ILMN_1659327	0.3	1.4 (0.94-2)	2.6	0.11
ILMN_1864900	0.3	1.4 (0.87-2.1)	1.8	0.18
ILMN_1837419	0.3	1.4 (0.033-55)	0.03	0.87
ILMN_1690443	0.3	1.3 (0.92-2)	2.4	0.12
ILMN_1668427	0.3	1.3 (0.43-4.2)	0.26	0.61
ILMN_1852041	0.3	1.3 (0.16-11)	0.08	0.78
ILMN_1667255	0.3	1.3 (0.034-54)	0.03	0.87
ILMN_1697006	0.29	1.3 (0.52-3.4)	0.35	0.55
ILMN_1781886	0.29	1.3 (0.18-10)	0.08	0.78
ILMN_1767388	0.28	1.3 (0.2-8.9)	0.09	0.77
ILMN_1865680	0.28	1.3 (0.12-14)	0.05	0.82
ILMN_1710954	0.27	1.3 (0.83-2.1)	1.4	0.24
ILMN_1917206	0.27	1.3 (0.17-10)	0.07	0.8
ILMN_1864588	0.27	1.3 (0.15-12)	0.06	0.81
ILMN_1886964	0.27	1.3 (0.051-34)	0.03	0.87
ILMN_1658593	0.27	1.3 (0.048-36)	0.03	0.87
ILMN_1676712	0.26	1.3 (1.1-1.6)	7	0.0084
ILMN_1764619	0.26	1.3 (0.73-2.3)	0.82	0.37
ILMN_1668771	0.26	1.3 (0.72-2.3)	0.76	0.38
ILMN_1883780	0.26	1.3 (0.19-9.1)	0.07	0.79
ILMN_1875354	0.24	1.3 (0.52-3.1)	0.27	0.6
ILMN_1895023	0.24	1.3 (0.12-14)	0.04	0.84
ILMN_1850903	0.24	1.3 (0.064-25)	0.02	0.88
ILMN_1671800	0.23	1.3 (0.88-1.8)	1.6	0.21
ILMN_1889063	0.23	1.3 (0.5-3.2)	0.25	0.62
ILMN_1899222	0.23	1.3 (0.11-14)	0.03	0.85
ILMN_1670866	0.23	1.3 (0.039-40)	0.02	0.9
ILMN_1673421	0.22	1.2 (0.71-2.2)	0.58	0.45
ILMN_1768553	0.22	1.2 (0.63-2.5)	0.39	0.53
ILMN_1898845	0.22	1.2 (0.2-8)	0.06	0.81
ILMN_1771494	0.21	1.2 (0.091-17)	0.03	0.87
ILMN_1748434	0.2	1.2 (0.65-2.3)	0.39	0.53
ILMN_1874672	0.2	1.2 (0.037-40)	0.01	0.91
ILMN_1737878	0.19	1.2 (0.65-2.3)	0.37	0.54
ILMN_1762769	0.19	1.2 (0.37-4)	0.1	0.75
ILMN_1724233	0.18	1.2 (0.35-4.1)	0.08	0.77
ILMN_1881668	0.18	1.2 (0.14-10)	0.03	0.87
ILMN_1893633	0.17	1.2 (0.89-1.6)	1.4	0.24
ILMN_2179579	0.17	1.2 (0.093-15)	0.02	0.9
ILMN_1758066	0.16	1.2 (0.91-1.5)	1.5	0.22
ILMN_1664089	0.16	1.2 (0.54-2.6)	0.16	0.69
ILMN_1893566	0.16	1.2 (0.17-8)	0.03	0.87
ILMN_1664364	0.16	1.2 (0.11-13)	0.02	0.9
ILMN_1853778	0.16	1.2 (0.092-15)	0.02	0.9
ILMN_1746309	0.15	1.2 (0.71-1.9)	0.35	0.55
ILMN_1906859	0.15	1.2 (0.61-2.2)	0.2	0.66
ILMN_1754584	0.15	1.2 (0.61-2.2)	0.2	0.65
ILMN_1825640	0.15	1.2 (0.37-3.6)	0.06	0.8
ILMN_1757142	0.15	1.2 (0.16-8.6)	0.02	0.89
ILMN_1797568	0.15	1.2 (0.066-20)	0.01	0.92
ILMN_1869599	0.15	1.2 (0.064-21)	0.01	0.92
ILMN_1755414	0.14	1.2 (0.74-1.8)	0.4	0.53
ILMN_1860953	0.14	1.1 (0.19-6.9)	0.02	0.88
ILMN_1768646	0.13	1.1 (0.76-1.7)	0.4	0.52
ILMN_1791297	0.13	1.1 (0.36-3.6)	0.05	0.82
ILMN_1740486	0.11	1.1 (0.75-1.6)	0.28	0.6
ILMN_1666633	0.11	1.1 (0.71-1.7)	0.22	0.64
ILMN_1676550	0.11	1.1 (0.15-8.2)	0.01	0.91
ILMN_1673390	0.11	1.1 (0.06-21)	0.01	0.94
ILMN_1763901	0.1	1.1 (0.86-1.4)	0.65	0.42
ILMN_1695301	0.1	1.1 (0.032-39)	0	0.95
ILMN_1664124	0.099	1.1 (0.098-12)	0.01	0.94
ILMN_1843777	0.099	1.1 (0.051-24)	0	0.95
ILMN_1913593	0.097	1.1 (0.17-7.3)	0.01	0.92
ILMN_1738738	0.096	1.1 (0.085-14)	0.01	0.94
ILMN_1681641	0.095	1.1 (0.53-2.3)	0.06	0.8
ILMN_1885448	0.085	1.1 (0.26-4.5)	0.01	0.91
ILMN_2401263	0.081	1.1 (0.42-2.8)	0.03	0.87
ILMN_1779974	0.076	1.1 (0.25-4.7)	0.01	0.92
ILMN_2195099	0.071	1.1 (0.056-20)	0	0.96
ILMN_1701924	0.07	1.1 (0.31-3.8)	0.01	0.91
ILMN_1896924	0.067	1.1 (0.18-6.3)	0.01	0.94
ILMN_2098947	0.063	1.1 (0.68-1.7)	0.08	0.78
ILMN_2099855	0.058	1.1 (0.049-23)	0	0.97
ILMN_1901493	0.058	1.1 (0.012-95)	0	0.98
ILMN_1859548	0.057	1.1 (0.048-23)	0	0.97
ILMN_1782653	0.056	1.1 (0.13-8.7)	0	0.96
ILMN_1709164	0.055	1.1 (0.68-1.6)	0.06	0.8
ILMN_1840624	0.053	1.1 (0.47-2.4)	0.02	0.9
ILMN_1803945	0.048	1 (0.78-1.4)	0.1	0.75
ILMN_1747573	0.047	1 (0.34-3.2)	0.01	0.93
ILMN_1867214	0.046	1 (0.17-6.3)	0	0.96
ILMN_1699383	0.045	1 (0.66-1.6)	0.04	0.85
ILMN_1871306	0.044	1 (0.38-2.9)	0.01	0.93
ILMN_1811644	0.044	1 (0.081-14)	0	0.97
ILMN_1896514	0.037	1 (0.17-6.4)	0	0.97
ILMN_2278433	0.036	1 (0.46-2.3)	0.01	0.93
ILMN_1869348	0.036	1 (0.16-6.8)	0	0.97
ILMN_1898124	0.035	1 (0.49-2.2)	0.01	0.93
ILMN_1657398	0.034	1 (0.68-1.6)	0.03	0.87
ILMN_1846430	0.034	1 (0.11-9.5)	0	0.98
ILMN_1705904	0.032	1 (0.047-23)	0	0.98
ILMN_1800914	0.027	1 (0.12-9.1)	0	0.98
ILMN_1802702	0.025	1 (0.082-13)	0	0.98
ILMN_1765032	0.018	1 (0.68-1.5)	0.01	0.93
ILMN_1732926	0.018	1 (0.61-1.7)	0	0.95
ILMN_1769112	0.015	1 (0.21-4.9)	0	0.98
ILMN_1716266	0.011	1 (0.021-48)	0	1
ILMN_1847175	0.0054	1 (0.009-110)	0	1
ILMN_2149952	0.0048	1 (0.45-2.2)	0	0.99
ILMN_1794233	0.002	1 (0.28-3.5)	0	1
ILMN_1683995	-0.002	1 (0.35-2.8)	0	1
ILMN_1896277	-0.0029	1 (0.068-15)	0	1
ILMN_1889874	-0.0071	0.99 (0.077-13)	0	1
ILMN_1874569	-0.0089	0.99 (0.23-4.3)	0	0.99
ILMN_1892086	-0.013	0.99 (0.74-1.3)	0.01	0.93
ILMN_1725528	-0.013	0.99 (0.5-1.9)	0	0.97
ILMN_1831091	-0.016	0.98 (0.13-7.2)	0	0.99
ILMN_1658375	-0.022	0.98 (0.042-23)	0	0.99
ILMN_1752746	-0.023	0.98 (0.058-16)	0	0.99
ILMN_1720004	-0.025	0.98 (0.2-4.7)	0	0.98
ILMN_1867725	-0.033	0.97 (0.3-3.1)	0	0.96
ILMN_1865874	-0.035	0.97 (0.062-15)	0	0.98
ILMN_1795467	-0.039	0.96 (0.18-5.2)	0	0.96
ILMN_1909156	-0.046	0.96 (0.68-1.3)	0.07	0.79
ILMN_1658628	-0.05	0.95 (0.41-2.2)	0.01	0.91
ILMN_1677834	-0.05	0.95 (0.099-9.1)	0	0.97
ILMN_1741621	-0.051	0.95 (0.14-6.5)	0	0.96
ILMN_1856484	-0.052	0.95 (0.71-1.3)	0.12	0.73
ILMN_1806189	-0.052	0.95 (0.07-13)	0	0.97
ILMN_2148527	-0.053	0.95 (0.82-1.1)	0.56	0.45
ILMN_1890332	-0.054	0.95 (0.023-40)	0	0.98
ILMN_1666169	-0.059	0.94 (0.35-2.6)	0.01	0.91
ILMN_1886735	-0.063	0.94 (0.059-15)	0	0.96
ILMN_1665740	-0.071	0.93 (0.22-4)	0.01	0.92
ILMN_1669413	-0.072	0.93 (0.19-4.5)	0.01	0.93
ILMN_1730768	-0.072	0.93 (0.025-35)	0	0.97
ILMN_1890481	-0.075	0.93 (0.051-17)	0	0.96
ILMN_1754042	-0.077	0.93 (0.16-5.5)	0.01	0.93
ILMN_1713982	-0.093	0.91 (0.012-71)	0	0.97
ILMN_1656069	-0.094	0.91 (0.37-2.3)	0.04	0.84
ILMN_1705921	-0.094	0.91 (0.26-3.2)	0.02	0.88
ILMN_2141650	-0.1	0.9 (0.11-7.4)	0.01	0.92
ILMN_1864467	-0.1	0.9 (0.071-11)	0.01	0.94
ILMN_1860194	-0.11	0.89 (0.034-23)	0	0.95
ILMN_1665778	-0.11	0.89 (0.0076-100)	0	0.96
ILMN_1913858	-0.12	0.89 (0.59-1.3)	0.32	0.57
ILMN_1652940	-0.12	0.89 (0.11-6.9)	0.01	0.91
ILMN_1828677	-0.12	0.89 (0.011-73)	0	0.96
ILMN_1682787	-0.12	0.88 (0.019-41)	0	0.95
ILMN_1865759	-0.13	0.88 (0.23-3.4)	0.03	0.85
ILMN_1654466	-0.13	0.87 (0.061-13)	0.01	0.92
ILMN_1900224	-0.13	0.87 (0.056-14)	0.01	0.92
ILMN_1873025	-0.13	0.87 (0.043-18)	0.01	0.93
ILMN_1727178	-0.15	0.86 (0.63-1.2)	0.86	0.35
ILMN_1831106	-0.16	0.86 (0.6-1.2)	0.72	0.39
ILMN_1781225	-0.16	0.85 (0.48-1.5)	0.28	0.6
ILMN_1824556	-0.16	0.85 (0.18-4.1)	0.04	0.84
ILMN_1856031	-0.16	0.85 (0.13-5.7)	0.03	0.87
ILMN_1738223	-0.17	0.84 (0.11-6.3)	0.03	0.87
ILMN_1905193	-0.17	0.84 (0.031-23)	0.01	0.92
ILMN_1790412	-0.18	0.84 (0.34-2.1)	0.15	0.7
ILMN_1694458	-0.18	0.84 (0.19-3.8)	0.05	0.82
ILMN_1799320	-0.18	0.83 (0.42-1.7)	0.27	0.6
ILMN_1831363	-0.18	0.83 (0.15-4.5)	0.04	0.83
ILMN_1811181	-0.19	0.83 (0.53-1.3)	0.67	0.41
ILMN_1900994	-0.19	0.83 (0.18-3.8)	0.06	0.81
ILMN_1704692	-0.19	0.83 (0.14-4.9)	0.04	0.83
ILMN_1717295	-0.19	0.83 (0.025-27)	0.01	0.91
ILMN_1695242	-0.19	0.82 (0.074-9.2)	0.02	0.88
ILMN_1889889	-0.19	0.82 (0.069-9.8)	0.02	0.88
ILMN_1764573	-0.2	0.82 (0.61-1.1)	2	0.16
ILMN_1733103	-0.2	0.82 (0.51-1.3)	0.75	0.39
ILMN_1798329	-0.21	0.81 (0.14-4.8)	0.05	0.82
ILMN_1901198	-0.22	0.8 (0.39-1.6)	0.36	0.55
ILMN_1878282	-0.22	0.8 (0.048-13)	0.02	0.88
ILMN_1910366	-0.23	0.8 (0.14-4.5)	0.07	0.8
ILMN_1900190	-0.23	0.8 (0.083-7.6)	0.04	0.84
ILMN_1783682	-0.23	0.79 (0.46-1.4)	0.73	0.39
ILMN_1754841	-0.23	0.79 (0.098-6.4)	0.05	0.83
ILMN_1902658	-0.24	0.79 (0.35-1.8)	0.32	0.57
ILMN_1721558	-0.26	0.77 (0.071-8.4)	0.05	0.83
ILMN_1670473	-0.26	0.77 (0.048-12)	0.03	0.85
ILMN_1845811	-0.27	0.76 (0.1-5.7)	0.07	0.79
ILMN_2087817	-0.27	0.76 (0.053-11)	0.04	0.84
ILMN_1750368	-0.28	0.75 (0.24-2.4)	0.24	0.63
ILMN_1701409	-0.3	0.74 (0.12-4.6)	0.11	0.75
ILMN_1832294	-0.3	0.74 (0.07-7.9)	0.06	0.81
ILMN_1916158	-0.3	0.74 (0.061-9)	0.06	0.81
ILMN_1652715	-0.3	0.74 (0.03-18)	0.03	0.85
ILMN_1849192	-0.31	0.74 (0.22-2.4)	0.25	0.62
ILMN_1897279	-0.31	0.73 (0.13-4.2)	0.12	0.73
ILMN_1723254	-0.31	0.73 (0.084-6.4)	0.08	0.78
ILMN_1681688	-0.31	0.73 (0.039-14)	0.04	0.84
ILMN_1855781	-0.32	0.73 (0.11-4.8)	0.11	0.74
ILMN_1883921	-0.32	0.73 (0.026-20)	0.03	0.85
ILMN_1844323	-0.32	0.72 (0.015-35)	0.03	0.87
ILMN_1888135	-0.33	0.72 (0.39-1.3)	1.1	0.29
ILMN_1833729	-0.33	0.72 (0.26-2)	0.41	0.52
ILMN_1661451	-0.33	0.72 (0.23-2.2)	0.34	0.56
ILMN_1847781	-0.33	0.72 (0.12-4.4)	0.13	0.72
ILMN_1653794	-0.34	0.71 (0.46-1.1)	2.4	0.12
ILMN_1725906	-0.34	0.71 (0.38-1.3)	1.1	0.3
ILMN_1794817	-0.34	0.71 (0.28-1.8)	0.52	0.47
ILMN_1839740	-0.35	0.71 (0.15-3.3)	0.19	0.66
ILMN_1667490	-0.35	0.71 (0.1-4.9)	0.12	0.72
ILMN_1911677	-0.35	0.7 (0.21-2.3)	0.34	0.56
ILMN_1915098	-0.35	0.7 (0.088-5.6)	0.11	0.74
ILMN_1896562	-0.36	0.7 (0.16-3)	0.24	0.62
ILMN_1838522	-0.36	0.7 (0.15-3.3)	0.21	0.65
ILMN_1840004	-0.36	0.7 (0.035-14)	0.06	0.81
ILMN_1908307	-0.36	0.7 (0.012-42)	0.03	0.86
ILMN_2052438	-0.37	0.69 (0.43-1.1)	2.2	0.13
ILMN_1917045	-0.37	0.69 (0.088-5.4)	0.12	0.72
ILMN_1848502	-0.37	0.69 (0.018-27)	0.04	0.84
ILMN_2052433	-0.38	0.68 (0.42-1.1)	2.4	0.12
ILMN_1813179	-0.39	0.68 (0.51-0.91)	6.7	0.0099
ILMN_1841809	-0.39	0.68 (0.057-8.1)	0.09	0.76
ILMN_1828429	-0.39	0.68 (0.04-11)	0.07	0.79
ILMN_1908897	-0.39	0.68 (0.039-12)	0.07	0.79
ILMN_1876729	-0.4	0.67 (0.17-2.6)	0.34	0.56
ILMN_1708535	-0.4	0.67 (0.028-16)	0.06	0.8
ILMN_1666891	-0.41	0.66 (0.13-3.3)	0.25	0.62
ILMN_1775664	-0.41	0.66 (0.048-9.1)	0.09	0.76
ILMN_1756131	-0.42	0.66 (0.46-0.95)	5	0.026
ILMN_1881333	-0.42	0.66 (0.25-1.7)	0.73	0.39
ILMN_1844128	-0.42	0.66 (0.19-2.3)	0.44	0.51
ILMN_1878928	-0.42	0.66 (0.04-11)	0.09	0.77
ILMN_2200659	-0.43	0.65 (0.47-0.89)	7.2	0.0075
ILMN_1871457	-0.43	0.65 (0.32-1.3)	1.4	0.24
ILMN_1887644	-0.43	0.65 (0.09-4.7)	0.18	0.67
ILMN_1854300	-0.43	0.65 (0.074-5.8)	0.15	0.7
ILMN_1785180	-0.44	0.65 (0.045-9.2)	0.1	0.75
ILMN_1858482	-0.44	0.65 (0.0086-49)	0.04	0.84
ILMN_2131022	-0.44	0.64 (0.12-3.5)	0.26	0.61
ILMN_1816778	-0.44	0.64 (0.016-27)	0.05	0.82
ILMN_1685833	-0.44	0.64 (0.0089-47)	0.04	0.84
ILMN_1755519	-0.45	0.64 (0.27-1.5)	1.1	0.3
ILMN_1708004	-0.45	0.64 (0.12-3.3)	0.29	0.59
ILMN_2228132	-0.45	0.64 (0.082-5)	0.18	0.67
ILMN_1874917	-0.45	0.64 (0.052-7.8)	0.12	0.73
ILMN_1803015	-0.45	0.64 (0.027-15)	0.08	0.78
ILMN_1916842	-0.46	0.63 (0.18-2.3)	0.51	0.48
ILMN_1817962	-0.47	0.63 (0.062-6.3)	0.16	0.69
ILMN_1705419	-0.47	0.62 (0.13-2.9)	0.36	0.55
ILMN_1833563	-0.48	0.62 (0.0084-46)	0.05	0.83
ILMN_2138622	-0.49	0.61 (0.21-1.8)	0.78	0.38
ILMN_1907544	-0.5	0.61 (0.28-1.3)	1.6	0.21
ILMN_1854474	-0.5	0.61 (0.043-8.6)	0.14	0.71
ILMN_1723567	-0.5	0.61 (0.014-26)	0.07	0.8
ILMN_1791884	-0.5	0.6 (0.26-1.4)	1.4	0.24
ILMN_1866290	-0.5	0.6 (0.18-2)	0.66	0.42
ILMN_1675437	-0.51	0.6 (0.17-2.2)	0.61	0.44
ILMN_1717726	-0.52	0.59 (0.068-5.1)	0.23	0.63
ILMN_1671820	-0.52	0.59 (0.063-5.6)	0.21	0.65
ILMN_1893511	-0.53	0.59 (0.28-1.2)	2.1	0.15
ILMN_1809404	-0.53	0.59 (0.04-8.6)	0.15	0.7
ILMN_1860008	-0.54	0.58 (0.26-1.3)	1.7	0.2
ILMN_1661673	-0.54	0.58 (0.22-1.5)	1.2	0.28
ILMN_1884449	-0.54	0.58 (0.09-3.8)	0.32	0.57
ILMN_1868091	-0.54	0.58 (0.063-5.4)	0.23	0.63
ILMN_1665260	-0.55	0.58 (0.33-1)	3.7	0.053
ILMN_1882649	-0.55	0.58 (0.16-2.1)	0.71	0.4
ILMN_1888935	-0.55	0.58 (0.13-2.6)	0.51	0.48
ILMN_1654779	-0.55	0.58 (0.095-3.5)	0.36	0.55
ILMN_1702496	-0.55	0.57 (0.33-1)	3.8	0.051
ILMN_1877818	-0.56	0.57 (0.07-4.7)	0.27	0.6
ILMN_1829907	-0.56	0.57 (0.011-28)	0.08	0.78
ILMN_1899499	-0.57	0.57 (0.028-11)	0.14	0.71
ILMN_1857466	-0.57	0.57 (0.023-14)	0.12	0.73
ILMN_1900235	-0.57	0.56 (0.034-9.4)	0.16	0.69
ILMN_1713141	-0.58	0.56 (0.32-0.96)	4.5	0.035
ILMN_1682783	-0.58	0.56 (0.23-1.4)	1.5	0.21
ILMN_1914612	-0.58	0.56 (0.11-2.8)	0.5	0.48
ILMN_1818677	-0.58	0.56 (0.056-5.5)	0.25	0.62
ILMN_1830756	-0.58	0.56 (0.046-6.8)	0.21	0.65
ILMN_1853783	-0.58	0.56 (0.013-24)	0.09	0.76
ILMN_1658469	-0.59	0.56 (0.36-0.87)	6.7	0.0097
ILMN_1784046	-0.59	0.56 (0.015-21)	0.1	0.75
ILMN_1820420	-0.59	0.56 (0.008-39)	0.07	0.79
ILMN_1805064	-0.59	0.55 (0.39-0.79)	11	0.0011
ILMN_1890749	-0.59	0.55 (0.065-4.7)	0.29	0.59
ILMN_1873492	-0.59	0.55 (0.05-6.2)	0.23	0.63
ILMN_1915345	-0.6	0.55 (0.14-2.1)	0.74	0.39
ILMN_1820550	-0.6	0.55 (0.053-5.6)	0.25	0.61
ILMN_1914405	-0.6	0.55 (0.012-26)	0.09	0.76
ILMN_1808769	-0.61	0.54 (0.35-0.85)	7.1	0.0076
ILMN_1901972	-0.61	0.54 (0.017-18)	0.12	0.73
ILMN_1726649	-0.61	0.54 (0.0068-43)	0.08	0.78
ILMN_1840273	-0.62	0.54 (0.12-2.5)	0.64	0.43
ILMN_1863230	-0.62	0.54 (0.11-2.6)	0.59	0.44
ILMN_1659737	-0.62	0.54 (0.024-12)	0.15	0.7
ILMN_1839647	-0.63	0.53 (0.11-2.6)	0.6	0.44
ILMN_1840957	-0.64	0.53 (0.11-2.6)	0.62	0.43
ILMN_1712854	-0.64	0.53 (0.064-4.3)	0.35	0.55
ILMN_1656842	-0.64	0.53 (0.029-9.6)	0.19	0.67
ILMN_1808602	-0.64	0.52 (0.18-1.5)	1.4	0.24
ILMN_1864512	-0.66	0.52 (0.1-2.6)	0.63	0.43
ILMN_1755635	-0.67	0.51 (0.24-1.1)	3	0.082
ILMN_2174711	-0.67	0.51 (0.19-1.4)	1.7	0.19
ILMN_1817518	-0.67	0.51 (0.0091-29)	0.1	0.75
ILMN_1692833	-0.68	0.51 (0.021-12)	0.17	0.68
ILMN_1882860	-0.69	0.5 (0.084-3)	0.56	0.45
ILMN_1668239	-0.69	0.5 (0.072-3.5)	0.48	0.49
ILMN_2390310	-0.7	0.5 (0.31-0.8)	8.4	0.0038
ILMN_1710829	-0.72	0.49 (0.02-12)	0.19	0.66
ILMN_1823226	-0.73	0.48 (0.056-4.2)	0.44	0.51
ILMN_1670215	-0.74	0.48 (0.23-1)	3.7	0.054
ILMN_1915805	-0.74	0.48 (0.13-1.7)	1.3	0.25
ILMN_1900845	-0.75	0.47 (0.21-1.1)	3.2	0.072
ILMN_1658937	-0.75	0.47 (0.014-17)	0.17	0.68
ILMN_1820259	-0.75	0.47 (0.012-19)	0.16	0.69
ILMN_1764029	-0.76	0.47 (0.18-1.2)	2.4	0.12
ILMN_1915908	-0.76	0.47 (0.041-5.3)	0.37	0.54
ILMN_1669715	-0.77	0.47 (0.21-1)	3.7	0.053
ILMN_1719831	-0.78	0.46 (0.019-11)	0.23	0.63
ILMN_1846242	-0.79	0.46 (0.064-3.2)	0.62	0.43
ILMN_1849638	-0.79	0.46 (0.047-4.5)	0.46	0.5
ILMN_1689749	-0.79	0.45 (0.13-1.6)	1.4	0.23
ILMN_1762876	-0.79	0.45 (0.084-2.4)	0.84	0.36
ILMN_1843203	-0.79	0.45 (0.062-3.3)	0.6	0.44
ILMN_1833465	-0.79	0.45 (0.047-4.4)	0.47	0.49
ILMN_1794611	-0.8	0.45 (0.12-1.7)	1.4	0.24
ILMN_1897200	-0.81	0.45 (0.022-9.2)	0.27	0.6
ILMN_1912160	-0.81	0.44 (0.12-1.6)	1.6	0.21
ILMN_1723210	-0.81	0.44 (0.0051-39)	0.13	0.72
ILMN_1808946	-0.82	0.44 (0.036-5.4)	0.41	0.52
ILMN_1773163	-0.82	0.44 (0.006-33)	0.14	0.71
ILMN_1897890	-0.84	0.43 (0.19-0.97)	4.1	0.043
ILMN_1728327	-0.85	0.43 (0.045-4.1)	0.54	0.46
ILMN_1824647	-0.85	0.43 (0.043-4.3)	0.52	0.47
ILMN_1653039	-0.87	0.42 (0.27-0.65)	15	0.00012
ILMN_2127451	-0.87	0.42 (0.13-1.4)	2	0.15
ILMN_1760352	-0.87	0.42 (0.013-14)	0.24	0.62
ILMN_1861556	-0.88	0.42 (0.089-2)	1.2	0.27
ILMN_1777614	-0.89	0.41 (0.1-1.7)	1.6	0.21
ILMN_1894057	-0.89	0.41 (0.091-1.8)	1.4	0.25
ILMN_1887823	-0.89	0.41 (0.077-2.2)	1.1	0.3
ILMN_1824465	-0.89	0.41 (0.029-5.8)	0.43	0.51
ILMN_1822378	-0.9	0.41 (0.13-1.3)	2.3	0.13
ILMN_1796465	-0.91	0.4 (0.02-8.3)	0.35	0.55
ILMN_1719224	-0.92	0.4 (0.25-0.63)	16	7.9e-05
ILMN_1893335	-0.92	0.4 (0.095-1.7)	1.6	0.21
ILMN_1867942	-0.92	0.4 (0.048-3.3)	0.72	0.4
ILMN_1663649	-0.93	0.4 (0.21-0.75)	8.2	0.0043
ILMN_1876313	-0.93	0.39 (0.0071-22)	0.21	0.65
ILMN_1885849	-0.94	0.39 (0.1-1.5)	1.8	0.17
ILMN_1777917	-0.94	0.39 (0.093-1.7)	1.6	0.2
ILMN_1780777	-0.95	0.39 (0.091-1.6)	1.6	0.2
ILMN_1838072	-0.95	0.39 (0.0089-17)	0.24	0.62
ILMN_1854170	-0.97	0.38 (0.062-2.3)	1.1	0.3
ILMN_1778787	-0.99	0.37 (0.052-2.7)	0.97	0.33
ILMN_1653833	-0.99	0.37 (0.022-6.4)	0.46	0.5
ILMN_2047354	-1	0.37 (0.21-0.65)	12	0.00068
ILMN_1669545	-1	0.37 (0.063-2.1)	1.3	0.26
ILMN_1771012	-1	0.37 (0.015-8.9)	0.38	0.54
ILMN_1732860	-1	0.36 (0.14-0.9)	4.8	0.028
ILMN_1745860	-1	0.36 (0.12-1.1)	3.4	0.065
ILMN_1871369	-1	0.36 (0.067-2)	1.4	0.24
ILMN_2220772	-1	0.36 (0.015-8.6)	0.39	0.53
ILMN_1910770	-1	0.36 (0.014-9.4)	0.38	0.54
ILMN_1887116	-1	0.36 (0.0081-16)	0.27	0.6
ILMN_1902604	-1.1	0.35 (0.085-1.4)	2.2	0.14
ILMN_1720902	-1.1	0.35 (0.051-2.4)	1.2	0.28
ILMN_1831111	-1.1	0.35 (0.045-2.7)	1	0.31
ILMN_1653801	-1.1	0.34 (0.086-1.3)	2.4	0.12
ILMN_1901455	-1.1	0.34 (0.084-1.4)	2.2	0.14
ILMN_1837348	-1.1	0.34 (0.018-6.3)	0.53	0.47
ILMN_1914434	-1.1	0.34 (0.0071-16)	0.31	0.58
ILMN_2164482	-1.1	0.34 (0.0055-21)	0.26	0.61
ILMN_1867897	-1.1	0.33 (0.12-0.93)	4.4	0.035
ILMN_1835135	-1.1	0.33 (0.023-4.6)	0.68	0.41
ILMN_1894547	-1.1	0.33 (0.017-6.2)	0.55	0.46
ILMN_1676545	-1.1	0.33 (0.016-6.6)	0.53	0.46
ILMN_1654609	-1.1	0.32 (0.19-0.53)	20	9.7e-06
ILMN_1856342	-1.1	0.32 (0.026-3.9)	0.8	0.37
ILMN_1714604	-1.1	0.32 (0.023-4.5)	0.71	0.4
ILMN_1872275	-1.2	0.32 (0.019-5.2)	0.65	0.42
ILMN_1788415	-1.2	0.32 (0.011-9.1)	0.45	0.5
ILMN_1681996	-1.2	0.31 (0.093-1.1)	3.5	0.062
ILMN_1679767	-1.2	0.31 (0.068-1.4)	2.2	0.14
ILMN_1913542	-1.2	0.31 (0.057-1.7)	1.8	0.18
ILMN_1826054	-1.2	0.31 (0.0055-18)	0.32	0.57
ILMN_1764120	-1.2	0.3 (0.027-3.4)	0.96	0.33
ILMN_2149793	-1.2	0.29 (0.061-1.4)	2.4	0.12
ILMN_1872435	-1.2	0.29 (0.037-2.3)	1.4	0.24
ILMN_1863271	-1.2	0.29 (0.032-2.6)	1.2	0.27
ILMN_1798038	-1.2	0.29 (0.022-3.8)	0.88	0.35
ILMN_1840941	-1.2	0.29 (0.0082-10)	0.45	0.5
ILMN_1839334	-1.2	0.29 (0.0049-17)	0.36	0.55
ILMN_1783973	-1.3	0.29 (0.099-0.82)	5.4	0.02
ILMN_2143383	-1.3	0.28 (0.079-1)	3.7	0.053
ILMN_1683149	-1.3	0.28 (0.0061-13)	0.42	0.52
ILMN_1652170	-1.3	0.27 (0.075-1)	3.8	0.05
ILMN_1906957	-1.3	0.27 (0.031-2.3)	1.4	0.23
ILMN_1680665	-1.3	0.27 (0.022-3.2)	1.1	0.3
ILMN_1849418	-1.3	0.27 (0.019-3.9)	0.91	0.34
ILMN_1754132	-1.3	0.27 (0.0092-8.1)	0.56	0.45
ILMN_1789323	-1.3	0.26 (0.039-1.8)	1.9	0.17
ILMN_1837584	-1.3	0.26 (0.011-6)	0.7	0.4
ILMN_1907861	-1.4	0.26 (0.051-1.3)	2.6	0.1
ILMN_1681252	-1.4	0.25 (0.13-0.5)	16	6.1e-05
ILMN_1833300	-1.4	0.25 (0.038-1.6)	2.1	0.15
ILMN_1821190	-1.4	0.25 (0.035-1.7)	2	0.16
ILMN_1768339	-1.4	0.25 (0.01-6.3)	0.71	0.4
ILMN_1879580	-1.4	0.25 (0.002-30)	0.33	0.57
ILMN_1668825	-1.4	0.24 (0.071-0.82)	5.2	0.022
ILMN_1882010	-1.4	0.24 (0.06-0.95)	4.2	0.041
ILMN_1876912	-1.4	0.24 (0.057-1)	3.8	0.05
ILMN_1667104	-1.4	0.24 (0.049-1.2)	3	0.081
ILMN_1910511	-1.4	0.24 (0.042-1.3)	2.7	0.1
ILMN_1881877	-1.4	0.24 (0.039-1.4)	2.4	0.12
ILMN_1896741	-1.5	0.23 (0.033-1.7)	2.1	0.15
ILMN_1906681	-1.5	0.23 (0.015-3.7)	1.1	0.3
ILMN_1884265	-1.5	0.23 (0.0057-9.7)	0.59	0.44
ILMN_1821064	-1.5	0.23 (0.0037-15)	0.47	0.49
ILMN_1841133	-1.5	0.22 (0.067-0.7)	6.5	0.011
ILMN_1882646	-1.5	0.22 (0.054-0.91)	4.4	0.036
ILMN_1818859	-1.5	0.22 (0.041-1.1)	3.3	0.068
ILMN_1731832	-1.5	0.22 (0.028-1.7)	2.1	0.15
ILMN_1886412	-1.5	0.22 (0.023-2.2)	1.7	0.2
ILMN_1778408	-1.5	0.22 (0.019-2.7)	1.4	0.24
ILMN_1776137	-1.5	0.22 (0.0066-7.4)	0.71	0.4
ILMN_2224231	-1.5	0.22 (0.0021-23)	0.41	0.52
ILMN_1901766	-1.5	0.21 (0.019-2.4)	1.6	0.21
ILMN_1914156	-1.5	0.21 (0.011-4.1)	1	0.3
ILMN_1821104	-1.6	0.21 (0.038-1.2)	3.2	0.076
ILMN_1829898	-1.6	0.21 (0.02-2.1)	1.8	0.19
ILMN_1890833	-1.6	0.21 (0.015-2.9)	1.4	0.24
ILMN_2211956	-1.6	0.21 (0.01-4.5)	0.99	0.32
ILMN_1828329	-1.6	0.21 (0.0078-5.7)	0.85	0.36
ILMN_1912505	-1.6	0.2 (0.033-1.2)	3.1	0.08
ILMN_1891310	-1.7	0.19 (0.024-1.5)	2.6	0.11
ILMN_1902186	-1.7	0.19 (0.014-2.5)	1.6	0.21
ILMN_1886218	-1.7	0.19 (0.013-2.6)	1.6	0.21
ILMN_1881598	-1.7	0.19 (0.012-2.9)	1.4	0.23
ILMN_1730818	-1.7	0.18 (0.067-0.51)	11	0.0011
ILMN_2157091	-1.7	0.18 (0.064-0.49)	11	0.00088
ILMN_1696306	-1.7	0.18 (0.041-0.79)	5.1	0.024
ILMN_1745851	-1.7	0.18 (0.03-1)	3.7	0.054
ILMN_1757137	-1.7	0.18 (0.028-1.2)	3.3	0.071
ILMN_1869288	-1.7	0.18 (0.025-1.3)	2.9	0.088
ILMN_1699152	-1.7	0.18 (0.013-2.4)	1.7	0.2
ILMN_1852923	-1.7	0.18 (0.0057-5.7)	0.94	0.33
ILMN_1828440	-1.7	0.18 (0.0029-12)	0.65	0.42
ILMN_1793347	-1.7	0.18 (0.0017-19)	0.53	0.47
ILMN_1698043	-1.7	0.17 (0.01-3)	1.5	0.23
ILMN_1687391	-1.8	0.17 (0.023-1.2)	3.2	0.073
ILMN_1812249	-1.8	0.17 (0.02-1.5)	2.5	0.11
ILMN_1865824	-1.8	0.17 (0.016-1.7)	2.3	0.13
ILMN_1871856	-1.8	0.17 (0.0017-16)	0.59	0.44
ILMN_1659452	-1.8	0.16 (0.019-1.3)	3	0.085
ILMN_1855346	-1.8	0.16 (0.0092-2.8)	1.6	0.21
ILMN_1670143	-1.8	0.16 (0.0015-17)	0.59	0.44
ILMN_1722825	-1.8	0.16 (0.00074-33)	0.46	0.5
ILMN_1854544	-1.9	0.16 (0.033-0.73)	5.6	0.018
ILMN_1908132	-1.9	0.16 (0.0031-7.7)	0.87	0.35
ILMN_1711352	-1.9	0.16 (0.0016-16)	0.63	0.43
ILMN_1892511	-1.9	0.15 (0.013-1.7)	2.4	0.13
ILMN_2204360	-1.9	0.15 (0.0084-2.8)	1.6	0.2
ILMN_2179967	-1.9	0.15 (0.0045-5.2)	1.1	0.3
ILMN_1793049	-1.9	0.14 (0.025-0.81)	4.8	0.028
ILMN_2054938	-1.9	0.14 (0.011-2)	2.1	0.15
ILMN_1679403	-2	0.14 (0.017-1.1)	3.6	0.059
ILMN_1883764	-2	0.14 (0.014-1.5)	2.7	0.1
ILMN_1691441	-2	0.14 (0.012-1.6)	2.5	0.11
ILMN_1849041	-2	0.14 (0.011-1.8)	2.3	0.13
ILMN_1829319	-2	0.14 (0.0091-2.2)	1.9	0.16
ILMN_1884878	-2	0.14 (0.0044-4.3)	1.3	0.26
ILMN_1845229	-2	0.14 (0.0022-8.6)	0.88	0.35
ILMN_2114185	-2	0.13 (0.019-0.89)	4.3	0.038
ILMN_1730340	-2	0.13 (0.018-0.98)	3.9	0.048
ILMN_1834252	-2	0.13 (0.013-1.4)	2.8	0.092
ILMN_1825875	-2	0.13 (0.0022-7.8)	0.95	0.33
ILMN_1656883	-2.1	0.13 (0.0058-2.8)	1.7	0.19
ILMN_1867014	-2.1	0.13 (0.005-3.2)	1.6	0.21
ILMN_1892537	-2.1	0.12 (0.0076-2)	2.1	0.14
ILMN_1853103	-2.1	0.12 (0.0045-3.3)	1.6	0.21
ILMN_1824721	-2.1	0.12 (0.0021-6.8)	1.1	0.3
ILMN_2197608	-2.1	0.12 (0.00037-39)	0.52	0.47
ILMN_1898235	-2.2	0.12 (0.0089-1.5)	2.7	0.1
ILMN_1916599	-2.2	0.12 (0.0037-3.6)	1.5	0.22
ILMN_1721459	-2.2	0.12 (0.0013-11)	0.87	0.35
ILMN_1850685	-2.2	0.11 (0.014-0.92)	4.2	0.041
ILMN_1912710	-2.2	0.11 (0.011-1.1)	3.5	0.061
ILMN_1832920	-2.2	0.11 (0.0064-1.8)	2.4	0.12
ILMN_1849653	-2.2	0.11 (0.0032-3.6)	1.6	0.21
ILMN_1815218	-2.2	0.11 (0.0024-5.2)	1.2	0.26
ILMN_1836132	-2.3	0.11 (0.0019-6)	1.2	0.27
ILMN_1851277	-2.3	0.1 (0.0048-2.2)	2.2	0.14
ILMN_1843974	-2.3	0.1 (0.0039-2.6)	1.9	0.17
ILMN_1721055	-2.3	0.1 (0.0016-6.4)	1.2	0.28
ILMN_1916040	-2.3	0.1 (0.0011-8.9)	1	0.32
ILMN_1851912	-2.3	0.099 (0.0089-1.1)	3.6	0.06
ILMN_1699211	-2.4	0.095 (0.0043-2.1)	2.2	0.14
ILMN_1855587	-2.4	0.094 (0.0063-1.4)	3	0.086
ILMN_1708023	-2.4	0.089 (0.00039-20)	0.76	0.38
ILMN_1873314	-2.4	0.087 (0.0092-0.81)	4.6	0.032
ILMN_1911696	-2.5	0.086 (0.015-0.49)	7.6	0.0057
ILMN_1830404	-2.5	0.082 (0.0019-3.5)	1.7	0.19
ILMN_2164478	-2.5	0.08 (0.0015-4.3)	1.6	0.21
ILMN_1857639	-2.6	0.077 (0.0019-3.2)	1.8	0.18
ILMN_1861120	-2.6	0.072 (0.0026-2)	2.4	0.12
ILMN_1886380	-2.6	0.071 (0.00044-11)	1	0.31
ILMN_1791596	-2.7	0.07 (0.0041-1.2)	3.4	0.066
ILMN_1865018	-2.7	0.07 (0.0012-4.1)	1.6	0.2
ILMN_1879041	-2.7	0.066 (0.0068-0.64)	5.5	0.019
ILMN_1864813	-2.7	0.066 (0.0039-1.1)	3.6	0.058
ILMN_1831532	-2.7	0.065 (0.0021-2)	2.4	0.12
ILMN_1789950	-2.8	0.062 (0.00055-6.9)	1.3	0.25
ILMN_1777684	-2.8	0.059 (0.00033-11)	1.2	0.28
ILMN_1675304	-2.9	0.057 (0.0029-1.1)	3.6	0.058
ILMN_1833417	-2.9	0.057 (0.0026-1.2)	3.3	0.069
ILMN_1864749	-2.9	0.056 (0.0047-0.67)	5.2	0.023
ILMN_1903204	-2.9	0.056 (0.00064-4.8)	1.6	0.2
ILMN_1661288	-2.9	0.055 (0.0031-0.98)	3.9	0.048
ILMN_1912513	-2.9	0.054 (0.0017-1.7)	2.8	0.096
ILMN_1901534	-2.9	0.054 (0.0011-2.8)	2.1	0.15
ILMN_1748277	-3	0.051 (0.0016-1.6)	2.8	0.093
ILMN_1806430	-3	0.049 (0.00056-4.3)	1.8	0.19
ILMN_1755835	-3	0.048 (0.0027-0.83)	4.4	0.037
ILMN_1806635	-3	0.047 (3e-04-7.5)	1.4	0.24
ILMN_2375184	-3	0.047 (0.0017-1.3)	3.3	0.071
ILMN_1705677	-3.1	0.046 (0.00052-4.1)	1.8	0.18
ILMN_1705527	-3.1	0.045 (0.0011-1.9)	2.6	0.1
ILMN_1905035	-3.1	0.044 (0.00069-2.8)	2.2	0.14
ILMN_1750173	-3.1	0.044 (0.00013-15)	1.1	0.29
ILMN_1910390	-3.1	0.043 (0.0012-1.6)	3	0.086
ILMN_1773848	-3.2	0.041 (0.00015-12)	1.2	0.27
ILMN_1859209	-3.3	0.039 (0.00022-6.9)	1.5	0.22
ILMN_1913142	-3.3	0.038 (0.002-0.76)	4.6	0.032
ILMN_1695754	-3.5	0.029 (0.00039-2.1)	2.6	0.1
ILMN_1823162	-3.6	0.027 (0.00067-1.1)	3.7	0.054
ILMN_1883680	-3.7	0.025 (0.00017-3.6)	2.1	0.15
ILMN_1697767	-3.8	0.023 (0.00055-0.99)	3.8	0.05
ILMN_1843175	-3.9	0.021 (0.00031-1.5)	3.2	0.075
ILMN_1868040	-3.9	0.02 (0.00031-1.3)	3.4	0.066
ILMN_1826440	-4	0.018 (0.00016-1.9)	2.9	0.09
ILMN_1835317	-4.1	0.017 (3.8e-05-7.4)	1.7	0.19
ILMN_2099858	-4.1	0.017 (0.00078-0.37)	6.7	0.0098
ILMN_1757535	-4.1	0.016 (0.00047-0.54)	5.3	0.021
ILMN_1814611	-4.2	0.015 (7.1e-05-3.1)	2.4	0.12
ILMN_2283814	-4.5	0.011 (5.6e-05-2.3)	2.7	0.099
ILMN_1796922	-4.5	0.011 (1e-04-1.1)	3.7	0.055
ILMN_1873463	-4.6	0.01 (8.7e-05-1.2)	3.6	0.057
ILMN_1899051	-4.7	0.0095 (0.00012-0.74)	4.4	0.036
ILMN_2211959	-4.7	0.0094 (5.6e-05-1.6)	3.2	0.074
ILMN_1685640	-5.1	0.006 (2.2e-05-1.6)	3.2	0.073
ILMN_1709900	-5.3	0.0048 (3.2e-05-0.73)	4.3	0.037
ILMN_1852537	-5.4	0.0044 (1.8e-05-1.1)	3.7	0.053
ILMN_1847838	-5.5	0.0041 (5.8e-05-0.29)	6.4	0.012
ILMN_1655026	-5.7	0.0035 (3.5e-05-0.35)	5.8	0.016
ILMN_1674116	-5.8	0.0032 (1.7e-05-0.6)	4.6	0.032
ILMN_1891287	-5.8	0.003 (1.1e-05-0.79)	4.2	0.041
ILMN_1723774	-5.8	0.0029 (2.8e-05-0.3)	6.1	0.014
ILMN_2124236	-6.1	0.0022 (1.3e-05-0.37)	5.5	0.019
ILMN_1830824	-6.5	0.0015 (2e-06-1.1)	3.8	0.053
ILMN_1774673	-6.5	0.0014 (8e-06-0.26)	6.1	0.014
ILMN_2291862	-7.1	0.00084 (2.9e-06-0.25)	6	0.015
ILMN_1664563	-7.5	0.00056 (8.9e-07-0.36)	5.2	0.023
