# Supplementary material for: Identification of a ten-long noncoding RNA signature for predicting the survival and immune status of patients with bladder urothelial carcinoma based on the GEO database: a superior machine learning model
Source: Aging (Albany NY). 2021 Feb 17;13(5):6957–81. doi: 10.18632/aging.202553 (PMC7993680; doi:10.18632/aging.202553)
Supplement: Supplementary Table 3 [file aging-13-202553-s004.xls]

## Sheet: Table_S1
Supplementary Table 3. Clinical data of the samples included in this study from the GSE32894 series (N=224).
Sample_ID	Gender (M/F)	Age (years)	Technical Replicate (yes)	Hybridization Slide	Labeling Plate	RNA Extraction Method (AllPrep/DNeasy)	Molecular Subtype	Tumor Stage (WHO 1999)	Tumor Grade (WHO 1999)	Squamous component MS2b2.2 cases (yes/no)	Progression to higher stage or radiotherapy (yes/no record)	DOD excluded (yes/no)	Exclusion Reason	Time to DOD (months)	DOD Event (yes/no)	pN at Cystectomy
UC_0001_1	M	57		S3	P4	DNeasy	MS1b	T2	G3			no		110.301	no	pN2
UC_0002_1	M	75		S2	P1	DNeasy	MS2b.1	T2	G2			yes	non-cystectomized MI disease
UC_0003_1	M	76		S20	P1	DNeasy	MS2a.2	T1	G2			yes	cystectomy but no sign of MI disease			pN0
UC_0006_2	M	81		S21	P5	DNeasy	MS2b.1	T1	G2			no		15.3863	no
UC_0007_1	M	59		S22	P1	DNeasy	MS2a.2	T3b	G3			no		36.36	yes	pN2
UC_0008_1	M	71		S23	P1	DNeasy	MS2b.1	T1	G2			no		104.384	no
UC_0009_1	M	55		S24	P1	DNeasy	MS1b	Ta	G2			no		63.9123	no
UC_0010_1	M	86		S12	P4	DNeasy	MS1b	T1	G2			no		55.0356	no
UC_0016_1	F	67		S25	P2	DNeasy	MS2b2.2	T2	G3	yes		no		5.39178	yes	pN2
UC_0017_1	M	89		S12	P4	DNeasy	MS1a	Ta	G2		yes (T1)	no		12.8219	no
UC_0018_1	M	79		S9	P5	DNeasy	MS2b.1	T1	G2			no		6.57534	no
UC_0022_1	M	36		S26	P2	DNeasy	MS1b	T1	G3			yes	cystectomy but no sign of MI disease			pN3
UC_0023_1	M	68		S1	P4	DNeasy	MS2b2.2	T3b	G3	no		no		75.9781	no	pN0
UC_0024_1	M	65		S27	P4	DNeasy	MS1b	Ta	G2			no		103.792	no
UC_0025_1	M	76		S19	P1	DNeasy	MS1a	Ta	G2			no		66.2466	no
UC_0027_1	M	83		S16	P5	DNeasy	MS2b2.1	T2	G2			yes	non-cystectomized MI disease
UC_0030_1	M	71		S24	P1	DNeasy	MS2b.1	T2	G3			no		96.3945	no	pN1
UC_0033_2	M	45		S19	P1	DNeasy	MS1b	Ta	G2			no		74.0384	no
UC_0034_1	F	75		S28	P2	DNeasy	MS2b.1	T2	G3			no		25.5781	no	pN0
UC_0037_1	F	62		S3	P4	DNeasy	MS1b	T1	G2			no		66.9041	no
UC_0040_1	F	75		S20	P1	DNeasy	MS1b	T1	G3			no		1.08493	no
UC_0041_2	F	74		S25	P2	DNeasy	MS1a	Ta	G1		yes (T2)	yes	non-cystectomized NMI with progression to MI or no record
UC_0042_2a	M	78		S24	P1	DNeasy	MS1a	Ta	G1			no		62.9918	no
UC_0043_1	M	83		S5	P2	DNeasy	MS2b.1	T1	G2			no		19.7589	no
UC_0046_1	M	71		S14	P2	DNeasy	MS2b.1	T2	G3			no		17.9178	yes	N+
UC_0049_2	M	75		S29	P5	DNeasy	MS2b.1	T1	G3			no		98.3671	no
UC_0050_1	M	67		S18	P4	AllPrep	MS1b	Ta	G1
UC_0053_1	M	74		S24	P1	DNeasy	MS2a.2	T1	G3		yes (Cystectomy Stage T1 + CIS)	yes	cystectomy but no sign of MI disease
UC_0055_1	F	91		S12	P4	DNeasy	MS2b2.2	T2	G3	yes		yes	non-cystectomized MI disease
UC_0059_1	M	52		S10	P2	DNeasy	MS2a.2	T2	G3			yes	non-cystectomized MI disease
UC_0060_4	M	71		S28	P2	DNeasy	MS1b	Ta	G2		yes (Cystectomy Stage T4a)	yes	cystectomy but no sign of MI disease			pN0
UC_0066_3	M	74		S23	P1	DNeasy	MS2b.1	T1	G3		yes (Cystectomy Stage T4a)	no		27.8137	no
UC_0067_1	M	84		S28	P2	DNeasy	MS1b	Ta	G2			no		66.7068	no
UC_0069_1	F	65		S19	P1	DNeasy	MS2a.2	T2	G3			no		97.7096	no	pN2
UC_0070_1	M	73		S17	P4	DNeasy	MS1a	Ta	G2			no		68.4493	no
UC_0075_1	M	64		S26	P2	DNeasy	MS1b	Ta	G2		yes (CIS)	no		81.9288	yes
UC_0077_1	M	59		S28	P2	DNeasy	MS2a.1	T1	G3		yes (T2)	yes	non-cystectomized NMI with progression to MI or no record
UC_0080_1	M	59		S28	P2	DNeasy	MS2b2.1	T1	G2			no		98.0712	no
UC_0086_1	M	64		S7	P1	DNeasy	MS2a.2	T2	G3			no		78.4438	no	N+
UC_0089_1	M	72		S3	P4	DNeasy	MS1a	Ta	G2			no		35.737	no
UC_0093_1	M	69		S19	P1	DNeasy	MS2a.2	T2	G3			no		26.5315	yes	pN2
UC_0094_1	M	72		S6	P6	DNeasy	MS2a.2	T2	G3		no record	yes	non-cystectomized MI disease
UC_0095_1	M	64		S17	P4	DNeasy	MS2a.2	T2	G3			no		29.4904	yes	N+
UC_0100_1	F	85		S31	P5	DNeasy	MS1b	Ta	G1			no		85.4137	no
UC_0101_1	M	82		S2	P1	DNeasy	MS1b	T1	G2			no		28.1096	no
UC_0103_1	F	90		S21	P5	DNeasy	MS2b2.2	T2	G3	no
UC_0106_2	F	79		S3	P4	DNeasy	MS1a	Ta	G1			no		73.874	no
UC_0111_1	F	81		S32	P1	DNeasy	MS1a	T2	G2		yes (T2)	yes	non-cystectomized MI disease
UC_0112_1	F	38		S27	P4	DNeasy	MS1b	Ta	G2			no		88.6027	no
UC_0113_1	F	92		S34	P6	DNeasy	MS2b2.2	T2	G3	yes		yes	non-cystectomized MI disease
UC_0114_1	F	82		S7	P1	DNeasy	MS1a	Ta	G2			no		72.1973	no
UC_0115_1	M	82		S1	P4	DNeasy	MS1a	T1	G2			no		44.5151	no
UC_0117_1	F	90		S25	P2	DNeasy	MS2b.1	T2	G3			yes	non-cystectomized MI disease
UC_0119_1	M	88		S11	P4	DNeasy	MS2b.1	T2	G3			yes	non-cystectomized MI disease
UC_0120_1	M	59		S25	P2	DNeasy	MS2a.2	T1	G3			no		43.0356	no
UC_0122_1	M	60		S25	P2	DNeasy	MS1b	T1	G3			no		82.7178	no
UC_0125_1	M	78		S34	P6	DNeasy	MS2b.1	Ta	Gx			no		21.1068	no
UC_0132_2	M	71		S23	P1	DNeasy	MS2b.1	T2b	G3		yes (T2)	no		69.5014	no	pN0
UC_0138_1	M	67		S10	P2	DNeasy	MS2a.1	T2	G3			no		54.3452	no	pN0
UC_0139_1	M	89		S29	P5	DNeasy	MS2b2.2	T2	G3	yes	yes (T3)	yes	non-cystectomized MI disease
UC_0145_1	M	70		S7	P1	DNeasy	MS1b	Ta	G2			no		84.9205	no
UC_0151_1	M	96		S31	P5	DNeasy	MS2a.2	T2	G3			yes	non-cystectomized MI disease
UC_0152_1	M	85		S14	P2	DNeasy	MS2a.2	T1	G3			no		27.3534	no
UC_0154_2	M	83		S35	P5	DNeasy	MS2b2.2	T2	G3	yes		yes	non-cystectomized MI disease
UC_0156_1	M	57		S18	P4	AllPrep	MS2a.2	Ta	G1
UC_0159_1	F	83		S10	P2	DNeasy	MS1b	T1	G2			no		37.874	no
UC_0162_1	M	46		S14	P2	DNeasy	MS1a	Ta	G2			no		54.3123	no
UC_0166_1	M	71		S19	P1	DNeasy	MS2a.2	T2	G3			no		88.1425	no	pN0
UC_0169_1	M	72		S17	P4	DNeasy	MS2a.2	T1	G3			yes	cystectomy but no sign of MI disease			pN0
UC_0170_1	M	68		S36	P1	DNeasy	MS2a.1	T1	G3			no		85.2164	no
UC_0176_2	M	77		S28	P2	DNeasy	MS1a	Ta	G2			no		82.8493	no
UC_0185_1	F	78		S15	P4	DNeasy	MS1a	T1	G2			no		79.3973	no
UC_0187_1	M	58		S5	P2	DNeasy	MS2a.1	T1	G3			yes	cystectomy but no sign of MI disease			pN0
UC_0193_1	M	82		S18	P4	DNeasy	MS2b2.2	T2	G3	yes	yes (T3)	yes	non-cystectomized MI disease
UC_0195_1	F	63		S37	P2	DNeasy	MS2b2.2	T2	G3	yes		no		86.4329	no	pN0
UC_0196_1	M	90		S19	P1	DNeasy	MS2b2.2	T2	G3	yes	yes (T3)	yes	non-cystectomized MI disease
UC_0199_1	M	85		S19	P1	DNeasy	MS1a	T1	G3		yes (T2)	yes	noncystectomized Tx cases
UC_0200_1	M	83		S14	P2	DNeasy	MS1b	T1	G2			no		13.1178	no
UC_0201_1	M	61		S9	P5	DNeasy	MS1b	T2	G3		no record	yes	non-cystectomized MI disease
UC_0203_1	M	61		S26	P2	DNeasy	MS2a.1	T1	G3			no		84.0329	no
UC_0207_1	M	67		S23	P1	DNeasy	MS2a.2	T2	G3			no		76.6685	no	pN0
UC_0208_1	F	88		S20	P1	DNeasy	MS1a	Ta	G1			no		49.3479	no
UC_0209_1	M	74		S32	P1	DNeasy	MS1a	Ta	G1			no		35.9671	no
UC_0210_2	M	59		S6	P6	DNeasy	MS1b	Ta	G1			no		72.5589	no
UC_0211_2	M	84		S7	P1	DNeasy	MS1b	Ta	G2			no		12.4274	no
UC_0213_1	M	78		S32	P1	DNeasy	MS1b	T1	G2			yes	cystectomy but no sign of MI disease			pN0
UC_0214_1	M	76		S14	P2	DNeasy	MS2b2.1	T3b	G3			no		6.18082	yes	pN0
UC_0215_1	M	69		S22	P1	DNeasy	MS1a	T1	G3			no		50.5973	no
UC_0218_2	M	50		S25	P2	DNeasy	MS2a.1	T1	G3		yes (Cystectomy Stage T2a)	no		60.1644	yes
UC_0223_1	M	52		S30	P2	DNeasy	MS2a.2	T1	G3			yes	cystectomy but no sign of MI disease			pN0
UC_0224_1	M	61		S25	P2	DNeasy	MS2a.2	T2	G3			no		7.52877	yes	N+
UC_0226_1	M	76		S15	P4	DNeasy	MS1b	T1	G2		yes (T2)	yes	non-cystectomized NMI with progression to MI or no record
UC_0230_1	M	67		S24	P1	DNeasy	MS2b2.2	T1	G3	yes		no		67.9233	no
UC_0231_1	M	81		S11	P4	DNeasy	MS2a.2	T2	G3			yes	non-cystectomized MI disease
UC_0234_1	M	72		S4	P5	DNeasy	MS2b.1	T2	G3		yes (radiotherapy)	yes	non-cystectomized MI disease
UC_0235_3	F	66		S26	P2	DNeasy	MS1b	T1	G2		yes (Cystectomy Stage Ta)	yes	cystectomy but no sign of MI disease			pN0
UC_0237_1	M	75		S22	P1	DNeasy	MS2a.1	T1	G3		no record	yes	non-cystectomized NMI with progression to MI or no record
UC_0238_1	M	75		S9	P5	DNeasy	MS1b	Ta	G3			no		10.0932	no
UC_0240_1	M	65		S32	P1	DNeasy	MS1a	Ta	G1			no		39.5836	no
UC_0244_1	M	79		S15	P4	DNeasy	MS2b2.2	T2	G3	yes	yes (radiotherapy)	yes	non-cystectomized MI disease
UC_0247_1	M	55		S6	P6	DNeasy	MS2b.1	T2	G2		no record	yes	non-cystectomized MI disease
UC_0248_2	M	77		S31	P5	DNeasy	MS1b	Ta	G1			no		45.337	no
UC_0249_1	M	73		S36	P1	DNeasy	MS1b	Tx	G2			yes	noncystectomized Tx cases
UC_0257_1	M	66		S13	P5	DNeasy	MS1a	Ta	G2		yes (CIS)	no		71.8027	no
UC_0260_1	F	72		S21	P5	AllPrep	MS2b.1	Ta	G2			no		78.6411	no
UC_0263_1	M	51		S22	P1	DNeasy	MS1a	T1	G2			yes	cystectomy but no sign of MI disease			pN0
UC_0265_1	M	85		S2	P1	DNeasy	MS2b2.2	T2	G3	yes	yes (radiotherapy)	yes	non-cystectomized MI disease
UC_0267_3	M	84		S7	P1	DNeasy	MS1b	T1	G3			no		49.1507	no
UC_0274_1	F	56		S14	P2	DNeasy	MS1a	Ta	G1			no		71.0795	no
UC_0277_1	M	70		S16	P5	DNeasy	MS2a.2	T2	G3			yes	non-cystectomized MI disease
UC_0279_1	M	44		S34	P6	DNeasy	MS1a	Ta	G2			no		69.5014	no
UC_0283_1	M	80		S30	P2	DNeasy	MS1b	T1	G3			no		55.6932	no
UC_0284_1	M	73		S7	P1	DNeasy	MS1b	Ta	G2			no		69.6658	no
UC_0287_1	M	75		S5	P2	DNeasy	MS2a.1	T1	G3			no		67.9233	no
UC_0290_1	M	75		S2	P1	DNeasy	MS1b	T1	G2			no		74.5644	no
UC_0295_2c	M	84		S22	P1	DNeasy	MS1b	Ta	G2			no		43.1014	no
UC_0299_1	M	77		S22	P1	DNeasy	MS2b.1	T1	G3			no		74.3342	no
UC_0301_1	M	67		S18	P4	DNeasy	MS1b	T1	G3			no		36.6247	no
UC_0302_1	M	75		S32	P1	DNeasy	MS2a.1	T1	G3			no		74.0712	no
UC_0312_1	F	70		S2	P1	DNeasy	MS2a.1	T1	G2			no		70.7178	no
UC_0321_1	F	51		S32	P1	DNeasy	MS2b2.1	T2a	G2			no		20.6137	yes	pN0
UC_0322_2	M	75		S25	P2	DNeasy	MS2b2.2	T2	G3	yes		no		29.9836	no	pN0
UC_0327_1	F	68		S32	P1	DNeasy	MS1a	Ta	G1			no		14.6959	no
UC_0328_1	F	85		S33	P6	DNeasy	MS2a.2	Ta	G2		yes (T1)	no		33.6	no
UC_0329_1	F	68		S14	P2	DNeasy	MS2b.1	T2	G3			no		69.9288	no	pN1
UC_0333_1	M	65		S30	P2	DNeasy	MS1b	T1	G3			no		0.2	no
UC_0334_1	M	81		S27	P4	AllPrep	MS2a.2	T1	G3
UC_0335_1	M	67		S26	P2	DNeasy	MS2b2.1	T2	G3			no		17.6877	yes	pN2
UC_0336_2	M	93		S33	P6	DNeasy	MS2b2.1	Ta	G2			no		14.0055	no
UC_0337_1	M	89		S33	P6	DNeasy	MS2a.2	T1	G3			no		0.624658	no
UC_0339_1	M	83		S26	P2	DNeasy	MS2b2.1	T2	G3			no		6.87123	yes	N+
UC_0340_1	F	83		S33	P6	DNeasy	MS1b	T2	G2		yes (T2)	yes	non-cystectomized MI disease
UC_0342_1	M	69		S26	P2	DNeasy	MS2a.1	T1	G3			no		63.0247	no
UC_0343_1	F	83		S27	P4	DNeasy	MS2b2.1	Ta	G2			no		30.8384	no
UC_0344_1	M	69		S34	P6	DNeasy	MS2b.1	T1	G2			no		49.4466	no
UC_0345_1	M	90		S34	P6	DNeasy	MS2b2.2	T2	G3	yes	yes (T3b)	yes	non-cystectomized MI disease
UC_0348_1	M	86		S6	P6	DNeasy	MS2b2.1	T2	G3			yes	non-cystectomized MI disease
UC_0349_3	F	60		S5	P2	DNeasy	MS2b.1	T2	G3		yes (T2)	no		57.5671	no	pN1mic
UC_0354_2c	M	80		S30	P2	DNeasy	MS1b	Ta	G2			no		56.5479	no
UC_0361_1	M	65		S30	P2	DNeasy	MS1a	Ta	G1			no		64.6356	no
UC_0367_1	M	57		S34	P6	DNeasy	MS1b	Ta	G3			no		64.4055	no
UC_0368_1	M	71		S37	P2	DNeasy	MS1b	Ta	G2			no		58.0274	no
UC_0369_1	F	71		S4	P5	AllPrep	MS1b	Ta	G1			no		54.411	no
UC_0372_1	M	57		S25	P2	DNeasy	MS2a.1	T3b	G3			no		58.0274	no	pN0
UC_0374_2a	F	86		S34	P6	DNeasy	MS1b	Ta	G1			no		50.6959	no
UC_0375_1	M	90		S6	P6	DNeasy	MS2b.1	Ta	G3			no		36.3288	no
UC_0376_1	M	58		S10	P2	DNeasy	MS2a.2	T1	G3			no		53.8192	no
UC_0384_1	M	65		S26	P2	DNeasy	MS2a.1	T1	G3			no		29.1288	no
UC_0386_1	F	83		S27	P4	DNeasy	MS1a	Ta	G2			no		13.7096	no
UC_0393_1	M	80		S3	P4	AllPrep	MS1b	Ta	G1			no		61.0521	no
UC_0394_1	M	79		S27	P4	DNeasy	MS2a.1	T2	G3			no		6.37808	yes	pN2
UC_0395_1a	F	57		S19	P1	DNeasy	MS2a.1	Ta	G1			no		65.326	no
UC_0397_1	M	68		S22	P1	DNeasy	MS2b.1	T3b	G3			no		24.1973	yes	pN0
UC_0398_1	F	56		S12	P4	AllPrep	MS1a	Ta	G1			no		63.8795	no
UC_0399_1	F	65		S32	P1	DNeasy	MS2a.2	T1	G3			yes	cystectomy but no sign of MI disease			pN0
UC_0400_1b	M	81		S36	P1	DNeasy	MS1b	T1	G2			yes	unclear follow up
UC_0405_1	M	66		S21	P5	AllPrep	MS1a	Ta	G1			no		63.9781	no
UC_0410_1a	M	76		S28	P2	DNeasy	MS2a.1	T2	G3			yes	non-cystectomized MI disease
UC_0414_1	M	58		S13	P5	AllPrep	MS1a	Ta	G1		yes (CIS)	no		61.7096	no
UC_0415_1	M	52		S33	P6	AllPrep	MS1a	Ta	G2		yes (T1)	no		28.5699	no
UC_0421_1	M	81		S29	P5	AllPrep	MS1b	Ta	G1			no		62.5315	no
UC_0429_1a	M	76		S29	P5	AllPrep	MS1b	Ta	G1			no		20.2849	no
UC_0437_1	F	58		S21	P5	AllPrep	MS2b.1	T2	G2		no record	yes	non-cystectomized MI disease
UC_0438_1	M	84		S21	P5	AllPrep	MS1b	Ta	G1			no		56.6795	no
UC_0442_1	M	70		S30	P2	DNeasy	MS1b	T1	G3			yes	cystectomy but no sign of MI disease			pN0
UC_0445_1	F	57		S1	P4	AllPrep	MS2b.1	Ta	G2			no		59.6055	no
UC_0447_1	M	65		S5	P2	DNeasy	MS2b2.2	T2b	G3	yes		no		34.7836	yes	pN0
UC_0453_1	M	59		S21	P5	AllPrep	MS2b.1	T2	G3		no record	yes	non-cystectomized MI disease
UC_0454_1	F	83		S13	P5	AllPrep	MS2b2.2	T2	G3	yes	yes (T4)	yes	non-cystectomized MI disease
UC_0456_2	M	87		S19	P1	DNeasy	MS1b	Ta	G2			no		3.22192	no
UC_0461_1	M	85		S31	P5	AllPrep	MS2a.2	T1	G3			no		39.1233	no
UC_0466_1a	M	78		S6	P6	DNeasy	MS2a.2	T1	G3			yes	cystectomy but no sign of MI disease			pN0
UC_0468_1	M	20		S3	P4	AllPrep	MS1b	Ta	G1			no		49.874	no
UC_0475_1	M	58		S2	P1	DNeasy	MS2b2.2	T3b	Gx	no		no		13.4137	yes	pN0
UC_0487_1	F	61		S1	P4	AllPrep	MS1a	Ta	G1			no		21.1726	no
UC_0488_2	M	77		S7	P1	DNeasy	MS1b	T1	G3			yes	cystectomy but no sign of MI disease			pN0
UC_0491_1	F	61		S9	P5	AllPrep	MS1b	Ta	G2			no		54.3452	no
UC_0493_1	M	61		S16	P5	AllPrep	MS1b	Ta	G2			no		57.6	no
UC_0494_1	M	61		S16	P5	AllPrep	MS2a.2	Ta	G3			no		50.8603	no
UC_0495_1	M	70		S18	P4	AllPrep	MS1b	Ta	G1			no		47.211	no
UC_0497_1	M	75		S13	P5	AllPrep	MS2b.1	T1	G3		yes (T2)	yes	non-cystectomized NMI with progression to MI or no record
UC_0499_1	M	86		S34	P6	AllPrep	MS2a.2	T1	G2			no		2.76164	no
UC_0506_1	F	56		S15	P4	AllPrep	MS1b	Ta	G1			no		55.0356	no
UC_0507_1	M	71		S24	P1	DNeasy	MS2a.2	T1	G3			yes	cystectomy but no sign of MI disease			pN0
UC_0512_1	M	65		S17	P4	AllPrep	MS2b.1	T1	G3		no record	yes	non-cystectomized NMI with progression to MI or no record
UC_0513_1b	F	60		S25	P2	DNeasy	MS1b	T1	G3			no		51.1233	no
UC_0516_1	M	61		S24	P1	DNeasy	MS2b.1	T2	G3			no		3.68219	yes	pN0
UC_0518_1	M	70		S2	P1	DNeasy	MS2a.2	T1	G4			yes	cystectomy but no sign of MI disease			pN0
UC_0519_1	M	56		S32	P1	DNeasy	MS2a.2	T2	G3			no		56.2192	no	pN0
UC_0521_1	M	79		S24	P1	DNeasy	MS2b.1	T2	G3			no		6.47671	yes	pN0(i+)
UC_0522_1	M	55		S37	P2	DNeasy	MS2b.1	T1	G3			yes	cystectomy but no sign of MI disease			pN0
UC_0523_1	M	77		S27	P4	AllPrep	MS2b2.1	Tx	G3		yes (T3b)	yes	noncystectomized Tx cases
UC_0524_1	F	94		S31	P5	AllPrep	MS2a.2	T2	G3			yes	non-cystectomized MI disease
UC_0525_1	M	72		S3	P4	AllPrep	MS2a.1	T1	G3			no		49.6767	no
UC_0528_1	M	61		S7	P1	DNeasy	MS2b2.1	T2	G3			no		53.7205	no	pN0
UC_0530_1	M	78		S13	P5	AllPrep	MS1b	T1	G2			no		46.7507	no
UC_0533_1	F	62		S25	P2	DNeasy	MS2a.2	T2	G3			no		41.063	no	pN0
UC_0536_1	M	57		S9	P5	AllPrep	MS1b	T1	G2			no		41.4575	no
UC_0537_1	M	63		S35	P5	AllPrep	MS1a	Ta	G2			no		15.7151	no
UC_0539_1	F	69		S25	P2	DNeasy	MS2b2.2	T2	G3	yes		no		40.7014	no	pN2
UC_0542_2	F	51		S2	P1	DNeasy	MS1b	Ta	G1			no		37.0521	no
UC_0544_1	M	69		S37	P2	DNeasy	MS1b	Ta	G2			no		37.7753	no
UC_0545_1	M	79		S22	P1	DNeasy	MS2b2.1	T2	G3			no		32.9096	no	pN0
UC_0546_1	M	75		S3	P4	AllPrep	MS2a.2	T1	G2			no		47.6384	no
UC_0548_1	M	72		S6	P6	AllPrep	MS1b	Ta	G1			no		45.2712	no
UC_0549_1	M	87		S9	P5	AllPrep	MS1b	T2	G2		yes (T2)	yes	non-cystectomized MI disease
UC_0551_1	M	73		S2	P1	DNeasy	MS2b.1	T1	G3			yes	cystectomy but no sign of MI disease			pN0
UC_0552_1	M	38		S30	P2	DNeasy	MS2a.2	T1	G3			yes	cystectomy but no sign of MI disease			pN1
UC_0554_1	F	62		S15	P4	AllPrep	MS2b2.1	T1	G2			no		47.0795	no
UC_0555_1	F	67		S18	P4	AllPrep	MS1a	Ta	G2			no		42.1151	no
UC_0556_1	M	63		S21	P5	AllPrep	MS2a.2	T2	G3		no record	yes	non-cystectomized MI disease
UC_0557_1	M	85		S12	P4	AllPrep	MS1a	Ta	G2			no		27.0247	no
UC_0558_1	F	75		S27	P4	AllPrep	MS2b.1	Ta	G1			no		44.7452	no
UC_0561_1a	F	80		S4	P5	AllPrep	MS2a.2	T1	G3			no		43.4301	no
UC_0563_1	F	61		S1	P4	AllPrep	MS1a	Ta	G2			no		41.2603	no
UC_0565_1	M	80		S4	P5	AllPrep	MS1b	Ta	G2			no		44.0548	no
UC_0566_1	F	57		S2	P1	DNeasy	MS2b2.2	T1	G3	no		yes	cystectomy but no sign of MI disease			N0
UC_0567_1	F	57		S24	P1	DNeasy	MS2b2.2	T2	G3	no		no		15.5836	yes	N+
UC_0572_1	M	72		S31	P5	AllPrep	MS2b2.2	T2	G3	no	no record	yes	non-cystectomized MI disease
UC_0573_1	M	67		S27	P4	AllPrep	MS1b	Ta	G2			no		40.8329	no
UC_0574_1	M	82		S17	P4	AllPrep	MS2a.2	T1	G2			no		26.137	no
UC_0575_1	M	62		S17	P4	AllPrep	MS1a	Ta	G1			no		32.3178	no
UC_0576_1	F	51		S12	P4	AllPrep	MS1b	Ta	G1			no		39.9123	no
UC_0577_1	M	70		S31	P5	AllPrep	MS2a.1	Ta	G3		yes (CIS)	no		38.2027	no
UC_0578_1	M	64		S17	P4	AllPrep	MS1a	Ta	G1			no		40.5699	no
UC_0579_1	F	77		S1	P4	AllPrep	MS2b2.2	T2	G3	no	no record	yes	non-cystectomized MI disease
UC_0580_1	F	60		S21	P5	AllPrep	MS2a.1	T1	G3			no		34.7178	no
UC_0582_1	F	87		S35	P5	AllPrep	MS2b2.1	T1	G3		yes (T2)	yes	noncystectomized Tx cases
UC_0583_1	F	76		S35	P5	AllPrep	MS2a.2	T1	G3			no		35.3753	no
UC_0584_1	F	78		S15	P4	AllPrep	MS1a	Ta	G1			no		25.3151	no
UC_0588_1	M	70		S33	P6	AllPrep	MS2b.1	Ta	G1			no		31.5288	no
UC_0589_1	M	77		S27	P4	DNeasy	MS2a.2	T1	G3			yes	cystectomy but no sign of MI disease			pN0
UC_0591_1	M	73		S16	P5	AllPrep	MS2a.1	Ta	G3			no		21.6986	no
UC_0592_1	M	58		S16	P5	AllPrep	MS2b.1	T1	G2			no		32.8767	no
UC_0593_1	M	80		S29	P5	AllPrep	MS1a	T1	G2			no		34.0603	no
UC_0595_1	M	76		S30	P2	DNeasy	MS2b.1	T2	G3			no		33.6986	no	pN0
UC_0598_1	M	80		S29	P5	AllPrep	MS1a	Ta	G2			no		24.7562	no
UC_0600_1	F	50		S9	P5	AllPrep	MS2b2.1	T2	G3			no		8.21918	yes	pN2
UC_0601_1	M	75		S21	P5	AllPrep	MS2a.2	Ta	G2			no		11.8685	no
UC_0605_1	M	75		S35	P5	AllPrep	MS1b	T2	G3			no		18.2466	yes	N+
UC_0606_1	F	78		S13	P5	AllPrep	MS1b	T1	G3			no		33.3699	no
UC_0607_1	M	79		S35	P5	AllPrep	MS2a.2	T1	G3			no		27.3863	no
UC_0608_1	M	59		S11	P4	AllPrep	MS2b2.1	T1	G3			yes	cystectomy but no sign of MI disease
UC_0610_1	M	67		S10	P2	DNeasy	MS2a.2	T2	G3			no		34.0603	no	pN0
UC_0611_1	F	70		S34	P6	AllPrep	MS1a	T1	G2			no		1.61096	no
UC_0612_1	M	72		S4	P5	AllPrep	MS1a	Ta	G1			no		31.3315	no
UC_0613_1	M	66		S18	P4	AllPrep	MS2b.1	Ta	G3			no		30.3781	no
UC_0614_1	M	65		S27	P4	AllPrep	MS2a.1	T1	G3			no		7.26575	no
UC_0615_1	M	60		S31	P5	AllPrep	MS2a.1	T2	G3			no		9.83014	yes	pN0
UC_0616_1	M	57		S29	P5	AllPrep	MS2b.1	Ta	G2			no		33.337	no
UC_0619_1	F	77		S4	P5	AllPrep	MS2b2.1	T1	G3			no		16.7671	no
UC_0620_1	M	64		S15	P4	AllPrep	MS2a.2	Ta	G3			no		30.8055	no
UC_0622_1	M	67		S33	P6	AllPrep	MS1a	Ta	G2			no		26.3014	no
UC_0624_1	M	83		S4	P5	AllPrep	MS1b	Ta	G1			no		29.9178	no
UC_0625_1	F	82		S31	P5	AllPrep	MS1b	Ta	G1		yes (T1)	no		29.4904	no
UC_0626_1	M	60		S8	P6	AllPrep	MS2a.1	Ta	G3			no		26.4658	no
UC_0628_1	M	80		S9	P5	AllPrep	MS2b2.1	Ta	G2			no		28.0438	no
UC_0692_1	M	63		S11	P4	AllPrep	MS2a.1	Ta	G2			no		26.663	no
UC_0694_1	F	79		S4	P5	AllPrep	MS2a.1	T1	G3			yes	cystectomy but no sign of MI disease			pN0
UC_0695_1	M	68		S11	P4	AllPrep	MS2a.2	T1	G3			yes	cystectomy but no sign of MI disease			pN0
UC_0696_1	F	84		S17	P4	AllPrep	MS2b.1	Ta	G2			no		25.4466	no
UC_0697_1	M	79		S11	P4	AllPrep	MS2b.1	Ta	G3			no		21.5671	no
UC_0698_1	M	55		S3	P4	AllPrep	MS1a	T1	G2			yes	cystectomy but no sign of MI disease			pN0
UC_0699_1	M	78		S1	P4	AllPrep	MS2a.2	T1	G3		yes (T2)	yes	non-cystectomized NMI with progression to MI or no record
UC_0700_1	F	67		S31	P5	AllPrep	MS2a.2	T1	G3			no		23.8027	no
UC_0701_1	F	66		S29	P5	AllPrep	MS2b.1	T2	G3			no		21.0082	no	pN0
UC_0703_1	M	76		S1	P4	AllPrep	MS1a	Ta	G2			no		23.7041	no
UC_0704_1	M	64		S12	P4	AllPrep	MS1b	T2	G3			yes	non-cystectomized MI disease
UC_0705_1	F	74		S12	P4	AllPrep	MS2b2.2	Ta	G2	no		yes	cystectomy but no sign of MI disease			pN0
UC_0706_1	M	57		S8	P6	AllPrep	MS1b	Ta	G1			no		23.8027	no
UC_0707_1	M	61		S33	P6	AllPrep	MS2a.2	T3	G2			no		15.0904	yes	pN2
UC_0710_1	F	79		S35	P5	AllPrep	MS1b	Ta	G2			no		20.4164	no
UC_0712_1	F	71		S35	P5	AllPrep	MS1b	Ta	G1			no		20.5479	no
UC_0713_1	M	66		S21	P5	AllPrep	MS2a.2	T2	G3			no		13.4137	yes	pN0
UC_0715_1	M	79		S13	P5	AllPrep	MS1a	Ta	G1			no		13.6438	no
UC_0717_1	M	95		S29	P5	AllPrep	MS1b	T2	G2			yes	non-cystectomized MI disease
UC_0718_1	F	74		S17	P4	AllPrep	MS1a	Ta	G2			no		19.8904	no
UC_0719_1	M	76		S17	P4	AllPrep	MS1b	T1	G2			no		16.7342	no
UC_0720_1	M	83		S9	P5	AllPrep	MS2a.1	Ta	G2		yes (T1)	no		19.463	no
UC_0721_1	F	69		S8	P6	AllPrep	MS2b2.1	Ta	G2			no		17.6877	no
UC_0722_1	M	68		S18	P4	AllPrep	MS2a.2	T2	G3		yes (T3b)	yes	non-cystectomized MI disease
UC_0723_1	M	75		S12	P4	AllPrep	MS1b	Ta	G1			no		17.6877	no
UC_0724_1	M	60		S16	P5	AllPrep	MS2b.1	T2	G3			no		17.7534	no	pN0
UC_0725_1	F	86		S18	P4	AllPrep	MS2b2.2	T2	G3	no	yes (T3)	yes	non-cystectomized MI disease
UC_0726_1	F	71		S13	P5	AllPrep	MS1a	Ta	G2			no		16.2411	no
UC_0743_1	F	72		S15	P4	AllPrep	MS1b	Ta	G2			no		17.2603	no
UC_0745_1	M	35		S35	P5	AllPrep	MS1a	Ta	G1			no		12.9534	no
UC_0746_1	M	70		S11	P4	AllPrep	MS2a.2	T2	G3			yes	non-cystectomized MI disease
UC_0750_1	M	76		S18	P4	AllPrep	MS2a.2	T1	G2			no		13.2822	no
UC_0751_1	M	77		S9	P5	AllPrep	MS2a.1	Ta	G3		yes (T2)	yes	non-cystectomized NMI with progression to MI or no record
UC_0752_1	M	79		S11	P4	AllPrep	MS1a	Ta	G2			no		8.58082	no
UC_0753_1	M	43		S16	P5	AllPrep	MS2a.1	T1	G2			no		11.737	no
UC_0757_1	F	89		S8	P6	AllPrep	MS2b2.2	T2	G3		yes (T3)	yes	non-cystectomized MI disease
UC_0760_1	M	76		S9	P5	AllPrep	MS1b	Ta	G1			no		6.57534	no
UC_0762_1	M	65		S13	P5	AllPrep	MS2b2.1	T2	G2		yes (T3b)	yes	non-cystectomized MI disease
UC_0765_1	M	55		S15	P4	AllPrep	MS2a.2	T2	G3			no		9.96164	no	pN0
UC_0766_1	M	80		S18	P4	AllPrep	MS1a	Ta	G2			no		9.1726	no
UC_0769_1	F	59		S31	P5	AllPrep	MS2b2.2	Ta	G1	no		no		0.5	no
UC_0770_1	M	65		S35	P5	AllPrep	MS2a.1	T1	G3			no		9.76438	no
UC_0775_1	M	32		S27	P4	AllPrep	MS1a	Ta	G1			no		5.58904	no
UC_0776_1	M	68		S15	P4	AllPrep	MS1b	T1	G3			no		6.67397	no
UC_0778_1	F	76		S12	P4	AllPrep	MS2b2.2	T2	G3	yes		no		10.9479	yes
UC_0779_1	M	71		S15	P4	AllPrep	MS2b2.2	T2	G3	yes		no		17.063	no
UC_0780_1	M	74		S11	P4	AllPrep	MS1a	Ta	G1			no		6.7726	no
UC_0781_1	M	59		S1	P4	AllPrep	MS2a.2	T2	G3			no		16.3726	no
UC_0782_1	M	63		S3	P4	AllPrep	MS2a.1	T4a	G3			no		19.4959	no
UC_0783_1	M	62		S4	P5	AllPrep	MS1a	T1	G2			no		30.1479	no
UC_0785_1	M	86		S11	P4	AllPrep	MS2b.1	T2	G3			yes	non-cystectomized MI disease
N_001_ureter				S1	P4	DNeasy		ureter
N_002_ureter				S3	P4	DNeasy		ureter
N_004_ureter				S3	P4	DNeasy		ureter
N_005_ureter				S1	P4	DNeasy		ureter
N_007_ureter				S11	P4	DNeasy		ureter
N_008_ureter				S12	P4	DNeasy		ureter
N_009_Urothel				S2	P1	DNeasy		urothel
N_031_Urothel				S15	P4	AllPrep		urothel
N_034_Urothel				S16	P5	AllPrep		urothel
N_035_Urothel				S16	P5	AllPrep		urothel
N_036_Urothel				S17	P4	AllPrep		urothel
N_037_Urothel				S1	P4	AllPrep		urothel
N_039_Urothel				S18	P4	AllPrep		urothel
N_001_ureter			yes	S2	P1	DNeasy
N_002_ureter			yes	S4	P5	DNeasy
N_002_ureter			yes	S5	P2	DNeasy
N_002_ureter			yes	S6	P6	DNeasy
N_004_ureter			yes	S7	P1	DNeasy
N_005_ureter			yes	S8	P6	DNeasy
N_005_ureter			yes	S9	P5	DNeasy
N_005_ureter			yes	S10	P2	DNeasy
N_007_ureter			yes	S7	P1	DNeasy
N_008_ureter			yes	S13	P5	DNeasy
N_008_ureter			yes	S14	P2	DNeasy
N_008_ureter			yes	S8	P6	DNeasy
UC_0001_1	M	57	yes	S19	P1	DNeasy
UC_0017_1	M	89	yes	S23	P1	DNeasy
UC_0023_1	M	68	yes	S23	P1	DNeasy
UC_0070_1	M	73	yes	S29	P5	DNeasy
UC_0070_1	M	73	yes	S30	P2	DNeasy
UC_0070_1	M	73	yes	S6	P6	DNeasy
UC_0089_1	M	72	yes	S22	P1	DNeasy
UC_0095_1	M	64	yes	S21	P5	DNeasy
UC_0095_1	M	64	yes	S14	P2	DNeasy
UC_0095_1	M	64	yes	S6	P6	DNeasy
UC_0112_1	F	38	yes	S13	P5	DNeasy
UC_0112_1	F	38	yes	S10	P2	DNeasy
UC_0112_1	F	38	yes	S33	P6	DNeasy
UC_0115_1	M	82	yes	S29	P5	DNeasy
UC_0115_1	M	82	yes	S28	P2	DNeasy
UC_0115_1	M	82	yes	S33	P6	DNeasy
UC_0169_1	M	72	yes	S8	P6	DNeasy
UC_0169_1	M	72	yes	S16	P5	DNeasy
UC_0169_1	M	72	yes	S5	P2	DNeasy
UC_0185_1	F	78	yes	S20	P1	DNeasy
UC_0226_1	M	76	yes	S13	P5	DNeasy
UC_0226_1	M	76	yes	S5	P2	DNeasy
UC_0226_1	M	76	yes	S33	P6	DNeasy
UC_0231_1	M	81	yes	S29	P5	DNeasy
UC_0231_1	M	81	yes	S26	P2	DNeasy
UC_0231_1	M	81	yes	S6	P6	DNeasy
UC_0301_1	M	67	yes	S24	P1	DNeasy
UC_0343_1	F	83	yes	S20	P1	DNeasy
UC_0386_1	F	83	yes	S31	P5	DNeasy
UC_0386_1	F	83	yes	S28	P2	DNeasy
UC_0386_1	F	83	yes	S34	P6	DNeasy
UC_0394_1	M	79	yes	S23	P1	DNeasy
UC_0522_1	M	55	yes	S20	P1	DNeasy
UC_0589_1	M	77	yes	S35	P5	DNeasy
UC_0589_1	M	77	yes	S23	P1	DNeasy
UC_0589_1	M	77	yes	S14	P2	DNeasy
UC_0589_1	M	77	yes	S34	P6	DNeasy
