# Supplementary material for: Identification of a ten-long noncoding RNA signature for predicting the survival and immune status of patients with bladder urothelial carcinoma based on the GEO database: a superior machine learning model
Source: Aging (Albany NY). 2021 Feb 17;13(5):6957–81. doi: 10.18632/aging.202553 (PMC7993680; doi:10.18632/aging.202553)
Supplement: Supplementary Table 4 [file aging-13-202553-s005.xlsx]

## Sheet: Sheet1
Supplementary Table 4. Clinical data of the samples included in this study from the GSE32548 series (N=131).
Sample ID	Age (years)	Gender (Female/Male)	Stage	Grade	DOD UC	Followup time (months)	Multifocality (1, 2-7, >7 or NA)	Tumor Size > 3 cm	Concomittant CIS	Progression to ≥T2	RAS mutation	FGFR3 mutation	CDKN2A mutation	PIK3CA mutation	TP53 mutation	TP53_MDM2 alteration
UC_0001_1	57	Male	≥T2	G3	NO	110.3	NA	NA	NA	NA	NO	YES	NO	YES	YES	YES
UC_0002_1	75	Male	≥T2	G2	YES	8.84	NA	NA	NA	NA	NO	YES	NO	NO	NO	NO
UC_0007_1	59	Male	≥T2	G3	YES	36.36	NA	NA	NA	NA	NO	NO	NO	NO	NO	NO
UC_0008_1	71	Male	T1	G2	NO	104.38	1	NO	NO	NO	NO	NO	NO	YES	YES	YES
UC_0009_1	55	Male	Ta	G2	NO	63.91	1	YES	NO	NO	NO	YES	NO	NO	NO	NO
UC_0017_1	89	Male	Ta	G2	NO	12.82	NA	NA	NO	NO	YES	NO	NO	NO	NO	NO
UC_0021_1	64	Male	Ta	G1	NO	104.647	1	NO	NO	NO	NO	YES	NO	NO	YES	YES
UC_0023_1	68	Male	≥T2	G3	NO	75.98	NA	NA	NA	NA	NO	NO	NO	NO	NO	NO
UC_0025_1	76	Male	Ta	G2	NO	66.25	2-7	YES	NO	NO	NO	NO	NO	NO	NO	NO
UC_0029_1	72	Male	Ta	G2	NO	22.1918	NA	NA	NO	NO	NO	NO	NO	NO	YES	YES
UC_0033_2	45	Male	Ta	G2	NO	74.04	2-7	NO	NO	NO	NO	NO	NA	NO	NO	YES
UC_0034_1	75	Female	≥T2	G3	NO	25.58	NA	NA	NA	NA	NO	NO	NO	NO	YES	YES
UC_0040_1	75	Female	T1	G3	NO	1.08	1	NO	NO	NO	NO	YES	NO	YES	NO	NO
UC_0041_2	74	Female	Ta	G1	YES	56.32	1	NO	NO	YES	NO	YES	NA	YES	NO	NO
UC_0043_1	83	Male	T1	G2	NO	19.76	1	NO	NO	NO	NO	YES	NO	NO	YES	YES
UC_0047_1	73	Male	Ta	G1	NO	10.1918	1	NA	NO	NO	NO	YES	NO	NO	NO	NO
UC_0051_1	74	Male	Ta	G2	NO	28.73	NA	NA	NA	NA	NO	YES	NO	NO	NO	NO
UC_0053_1	74	Male	T1	G3	YES	68.78	1	NA	NO	NO	NO	NO	NO	NO	YES	YES
UC_0057_1	59	Male	Ta	G2	NO	100.34	NA	NO	NO	NO	NO	NO	NO	NO	YES	YES
UC_0059_1	52	Male	≥T2	G3	NO	90.64	NA	NA	NA	NA	NO	NO	NO	NO	YES	YES
UC_0060_1	69	Male	Ta	G2	YES	32.2849	1	NO	NO	YES	NO	NO	NO	NO	YES	YES
UC_0066_3	74	Male	T1	G3	NO	27.81	2-7	YES	YES	YES	NO	NO	NA	NA	NO	NO
UC_0067_1	84	Male	Ta	G2	NO	66.71	1	NO	NO	NO	NO	YES	NO	YES	NO	NO
UC_0069_1	65	Female	≥T2	G3	NO	97.71	NA	NA	NA	NA	NO	NO	NO	NO	YES	YES
UC_0070_1	73	Male	Ta	G2	NO	68.45	1	YES	NO	NO	NO	YES	NO	NO	NO	NO
UC_0073_1	59	Male	Ta	G2	NO	34.9808	1	NO	NO	NO	NO	NO	NO	NO	NO	NO
UC_0075_1	64	Male	Ta	G2	YES	81.93	2-7	NO	NO	YES	NO	NO	NO	NO	NO	NO
UC_0077_1	59	Male	T1	G3	NO	32.48	2-7	NA	NO	YES	NO	NO	NO	NO	YES	YES
UC_0080_1	59	Male	T1	G2	NO	98.07	1	NA	NO	NO	NO	YES	NA	NO	YES	YES
UC_0086_1	64	Male	≥T2	G3	NO	78.44	NA	NA	NA	NA	NO	NO	NO	NO	YES	YES
UC_0089_1	72	Male	Ta	G2	NO	35.74	1	YES	NO	NO	NO	YES	NO	NO	NO	NO
UC_0093_1	69	Male	≥T2	G3	YES	26.53	NA	NA	NA	NA	NO	NO	NO	NO	YES	YES
UC_0095_1	64	Male	≥T2	G3	YES	29.49	NA	NA	NA	NA	NO	NO	NO	NO	NO	YES
UC_0097_1	73	Male	Ta	G3	NO	91.8575	1	NO	NO	NO	NO	NO	NO	YES	NO	YES
UC_0101_1	82	Male	T1	G2	NO	28.11	1	NO	NO	NO	NO	NO	NO	NO	NO	YES
UC_0106_1	78	Female	Ta	G1	NO	90.6082	1	NA	NO	NO	NO	YES	NO	YES	NO	NO
UC_0111_1	81	Female	≥T2	G2	YES	14.53	NA	NA	NA	NA	NO	YES	NO	NO	NO	NO
UC_0112_1	38	Female	Ta	G2	NO	88.6	1	NO	NO	NO	NO	NO	NO	NO	NO	NO
UC_0114_1	82	Female	Ta	G2	NO	72.2	2-7	NO	NO	NO	NO	YES	NO	YES	NO	NO
UC_0115_1	82	Male	T1	G2	NO	44.52	1	YES	NO	NO	YES	YES	NO	NO	NO	NO
UC_0117_1	90	Female	≥T2	G3	YES	0.89	NA	NA	NA	NA	NO	YES	NO	NO	NO	YES
UC_0120_1	59	Male	T1	G3	NO	43.04	2-7	YES	YES	NO	NO	NO	NO	NO	YES	YES
UC_0122_1	60	Male	T1	G3	NO	82.72	2-7	YES	YES	NO	NO	NO	NO	NO	NO	YES
UC_0129_1	80	Male	Ta	G1	NO	43.7918	1	NO	NO	NO	NO	YES	NO	NO	YES	YES
UC_0130_1	66	Female	Ta	G1	NO	79.3973	NA	NA	NO	NO	NO	YES	NO	NO	NO	NO
UC_0137_1	78	Male	Ta	G1	NO	89.0959	NA	NA	NO	NO	NO	YES	NO	NO	NO	NO
UC_0138_1	67	Male	≥T2	G3	NO	54.35	NA	NA	NA	NA	NO	NO	NO	NO	YES	YES
UC_0145_1	70	Male	Ta	G2	NO	84.92	1	NO	NO	NO	NO	YES	NO	YES	NO	YES
UC_0147_1	81	Female	Ta	G1	NO	84.8877	1	NA	NO	NO	NO	YES	NO	NO	NO	NO
UC_0152_1	85	Male	T1	G3	NO	27.35	1	YES	NO	NO	NO	NO	NO	NO	YES	YES
UC_0159_1	83	Female	T1	G2	NO	37.87	1	YES	NO	NO	NO	YES	NO	NO	NO	NO
UC_0162_1	46	Male	Ta	G2	NO	54.31	1	NO	NO	NO	NO	YES	NO	NO	NO	NO
UC_0166_1	71	Male	≥T2	G3	NO	88.14	NA	NA	NA	NA	NO	YES	NO	NO	YES	YES
UC_0169_1	72	Male	T1	G3	NO	71.34	NA	NA	NO	NO	NO	NO	NO	NO	NO	YES
UC_0170_1	68	Male	T1	G3	NO	85.22	1	YES	YES	NO	NO	NO	NO	NO	NO	NO
UC_0173_1	70	Female	Ta	G1	NO	73.1507	NA	NO	NO	NO	NO	YES	NO	YES	NO	NO
UC_0176_2	77	Male	Ta	G2	NO	82.85	1	NO	NO	NO	NO	YES	NA	NO	NO	NO
UC_0185_1	78	Female	T1	G2	NO	79.4	1	NO	NO	NO	YES	NO	NO	YES	NO	NO
UC_0187_1	58	Male	T1	G3	NO	5.29	1	YES	NO	NO	NO	NO	NO	NO	YES	YES
UC_0192_1	82	Male	Ta	G2	NO	85.7753	1	NO	NO	NO	YES	NO	NO	YES	NO	YES
UC_0195_1	63	Female	≥T2	G3	NO	86.43	NA	NA	NA	NA	NO	NO	NO	NO	NO	NO
UC_0196_1	90	Male	≥T2	G3	YES	8.98	NA	NA	NA	NA	NO	NO	NO	NO	NO	YES
UC_0199_1	85	Male	T1	G3	YES	36.59	2-7	YES	NO	YES	NO	NO	NO	NO	NO	YES
UC_0200_1	83	Male	T1	G2	NO	13.12	1	NO	NO	NO	YES	NO	NO	NO	NO	NO
UC_0203_1	61	Male	T1	G3	NO	84.03	2-7	YES	NO	NO	NO	NO	NO	NO	YES	YES
UC_0207_1	67	Male	≥T2	G3	NO	76.67	NA	NA	NA	NA	NO	NO	NO	NO	YES	YES
UC_0208_1	88	Female	Ta	G1	NO	49.35	2-7	YES	NO	NO	NO	YES	NA	NO	NO	NO
UC_0209_1	74	Male	Ta	G1	NO	35.97	1	NO	NO	NO	NO	NO	NA	YES	NO	NO
UC_0213_1	78	Male	T1	G2	NO	65.59	2-7	NA	YES	NO	NO	NO	NA	NO	NO	YES
UC_0214_1	76	Male	≥T2	G3	YES	6.18	NA	NA	NA	NA	NO	NO	NO	YES	YES	YES
UC_0215_1	69	Male	T1	G3	NO	50.6	1	YES	NO	NO	NO	YES	NO	YES	YES	YES
UC_0218_2	50	Male	T1	G3	YES	60.16	1	NA	NO	NO	NO	NO	NA	NO	YES	YES
UC_0223_1	52	Male	T1	G3	NO	81.24	NA	NA	NA	NO	YES	NO	NO	NO	NO	NO
UC_0224_1	61	Male	≥T2	G3	YES	7.53	NA	NA	NA	NA	NO	NO	NO	NO	YES	YES
UC_0226_1	76	Male	T1	G2	NO	81.21	1	NA	NO	YES	NO	NO	NO	NO	NO	YES
UC_0230_1	67	Male	T1	G3	NO	67.92	1	NO	NO	NO	NO	YES	NO	NO	YES	YES
UC_0231_1	81	Male	≥T2	G3	NO	75.29	NA	NA	NA	NA	NO	NO	NO	NO	NO	NO
UC_0235_1	65	Female	Ta	G3	NO	74.2356	2-7	NO	NO	NO	NO	YES	NO	NO	NO	NO
UC_0237_1	75	Male	T1	G3	YES	0.59	2-7	YES	NO	NO	NO	NO	NO	NO	YES	YES
UC_0240_1	65	Male	Ta	G1	NO	39.58	1	NO	NO	NO	NO	YES	NA	YES	NO	NO
UC_0242_1	70	Female	≥T2	G3	YES	3.84658	NA	NA	NA	NA	YES	NO	NO	NO	YES	YES
UC_0249_1	73	Male	Tx	G2	NO	68.55	1	YES	NO	NO	NO	YES	NO	YES	NO	YES
UC_0263_1	51	Male	T1	G2	NO	60.95	1	NO	NO	NO	NO	YES	NO	NO	NO	NO
UC_0265_1	85	Male	≥T2	G3	YES	11.54	NA	NA	NA	NA	NO	YES	NO	NO	YES	YES
UC_0267_3	84	Male	T1	G3	NO	49.15	2-7	NO	NO	NO	NO	NO	NO	NO	NO	NO
UC_0274_1	56	Female	Ta	G1	NO	71.08	1	NO	NO	NO	NO	YES	NA	NO	NO	NO
UC_0283_1	80	Male	T1	G3	NO	55.69	1	NO	NO	NO	NO	NO	NO	NO	NO	YES
UC_0284_1	73	Male	Ta	G2	NO	69.67	1	NO	NO	NO	NO	YES	NA	YES	NO	NO
UC_0287_1	75	Male	T1	G3	NO	67.92	2-7	YES	YES	NO	NO	NO	NA	NO	YES	YES
UC_0290_1	75	Male	T1	G2	NO	74.56	1	YES	NO	NO	NO	NO	YES	YES	YES	YES
UC_0299_1	77	Male	T1	G3	NO	74.33	1	NO	NO	NO	NO	NO	NA	NO	NO	NO
UC_0301_1	67	Male	T1	G3	NO	36.62	2-7	NO	YES	NO	NO	YES	NO	NO	YES	YES
UC_0302_1	75	Male	T1	G3	NO	74.07	>7	NO	YES	NO	NO	NO	NO	NO	YES	YES
UC_0312_1	70	Female	T1	G2	NO	70.72	2-7	NO	NO	NO	NO	YES	NO	NO	YES	YES
UC_0321_1	51	Female	≥T2	G2	YES	20.61	NA	NA	NA	NA	NO	YES	NO	NO	YES	YES
UC_0322_2	75	Male	≥T2	G3	NO	29.98	NA	NA	NA	NA	NO	NO	NO	NO	YES	YES
UC_0327_1	68	Female	Ta	G1	NO	14.7	1	NO	NO	NO	NO	YES	NA	YES	NO	NO
UC_0329_1	68	Female	≥T2	G3	NO	69.93	NA	NA	NA	NA	NO	NO	YES	NO	YES	YES
UC_0333_1	65	Male	T1	G3	NO	0.2	NA	NA	NA	NO	NO	NO	NA	NO	NO	NO
UC_0335_1	67	Male	≥T2	G3	YES	17.69	NA	NA	NA	NA	NO	NO	NA	NO	YES	YES
UC_0339_1	83	Male	≥T2	G3	YES	6.87	NA	NA	NA	NA	NO	NO	NO	NO	YES	YES
UC_0342_1	69	Male	T1	G3	NO	63.02	1	NA	NO	NO	NO	NO	NA	NO	YES	YES
UC_0343_1	83	Female	Ta	G2	NO	30.84	1	YES	NO	NO	NO	YES	NA	NO	NO	NO
UC_0349_2	59	Female	T1	G3	NO	65.9178	>7	YES	NO	YES	NO	YES	NO	NO	NO	NO
UC_0361_1	65	Male	Ta	G1	NO	64.64	1	NA	NO	NO	NO	YES	NA	NO	NO	NO
UC_0368_1	71	Male	Ta	G2	NO	58.03	2-7	YES	NO	NO	NO	YES	NA	NO	YES	YES
UC_0372_1	57	Male	≥T2	G3	NO	58.03	NA	NA	NA	NA	NO	NO	NO	NO	NO	NO
UC_0376_1	58	Male	T1	G3	NO	53.82	1	NO	NO	NO	NO	NO	NO	NO	YES	YES
UC_0384_1	65	Male	T1	G3	NO	29.13	1	NA	YES	NO	NO	NO	NA	NO	YES	YES
UC_0386_1	83	Female	Ta	G2	NO	13.71	1	NO	NO	NO	NO	YES	NA	YES	NO	NO
UC_0394_1	79	Male	≥T2	G3	YES	6.38	NA	NA	NA	NA	NO	NO	NO	NO	NO	NO
UC_0399_1	65	Female	T1	G3	NO	63.85	1	NA	NO	NO	NO	NO	NO	NO	YES	YES
UC_0400_1b	81	Male	T1	G2	NA	NA	1	YES	NO	NO	NO	NO	NO	NA	NO	NO
UC_0410_1b	80	Male	≥T2	G3	NO	15.1233	NA	NA	NA	NA	NO	NO	NO	NO	YES	YES
UC_0488_2	77	Male	T1	G3	NO	53.36	NA	NA	NO	NO	YES	NO	NA	NO	YES	YES
UC_0507_1	71	Male	T1	G3	NO	49.38	1	NA	NO	NO	NO	NO	NA	NO	NO	NO
UC_0513_1a	59	Female	T1	G3	NO	51.1233	2-7	NA	NO	NO	NO	YES	NO	NO	NO	NO
UC_0516_1	61	Male	≥T2	G3	YES	3.68	NA	NA	NA	NA	YES	NO	NA	NO	YES	YES
UC_0518_1	70	Male	T1	G3	NO	56.12	NA	NA	NA	NO	NO	NO	NA	NO	YES	YES
UC_0519_1	56	Male	≥T2	G3	NO	56.22	NA	NA	NA	NA	NO	YES	NA	YES	NO	YES
UC_0521_1	79	Male	≥T2	G3	YES	6.48	NA	NA	NA	NA	NO	NO	NA	NO	NO	NO
UC_0522_1	55	Male	T1	G3	NO	18.21	1	NO	NO	NO	NO	NO	NA	NO	YES	YES
UC_0528_1	61	Male	≥T2	G3	NO	53.72	NA	NA	NA	NA	NO	NO	NA	NO	NO	YES
UC_0533_1	62	Female	≥T2	G3	NO	41.06	NA	NA	NA	NA	NO	NO	NA	NO	YES	YES
UC_0539_1	69	Female	≥T2	G3	NO	40.7	NA	NA	NA	NA	NO	NO	NA	NO	YES	YES
UC_0545_1	79	Male	≥T2	G3	NO	32.91	NA	NA	NA	NA	NO	YES	NA	YES	YES	YES
UC_0551_1	73	Male	T1	G3	YES	20.58	>7	NA	YES	NO	NO	NO	NA	NO	YES	YES
UC_0552_1	38	Male	T1	G3	NO	46.19	2-7	NO	NO	NO	NO	NO	NA	NO	NO	NO
UC_0566_1	57	Female	T1	G3	NO	12.03	NA	NA	NA	NO	NO	NO	NA	NO	YES	YES
UC_0589_1	77	Male	T1	G3	NO	26.93	2-7	NO	NO	NO	NO	NO	NA	NO	YES	YES
UC_0610_1	67	Male	≥T2	G3	NO	34.06	NA	NA	NA	NA	NO	NO	NA	NO	NO	NO
