# Supplementary material for: Identification of a ten-long noncoding RNA signature for predicting the survival and immune status of patients with bladder urothelial carcinoma based on the GEO database: a superior machine learning model
Source: Aging (Albany NY). 2021 Feb 17;13(5):6957–81. doi: 10.18632/aging.202553 (PMC7993680; doi:10.18632/aging.202553)
Supplement: Supplementary Table 10 [file aging-13-202553-s011.xlsx]

## Sheet: Supplementary table 1
Supplementary Table 10. Gene set enrichment analysis describes biological pathways associated with the risk score.
Pathway	EnrichedScore	NormalizedEnrichedScore	P-value	FDR	Direction
Activation of ATR in response to replication stress	-0.8026	-2.197	0	0	Down
Activation of the pre-replicative complex	-0.8028	-2.1534	0	0	Down
Amplification of signal from unattached kinetochores via a MAD2 inhibitory signal	-0.652	-2.1813	0	0	Down
Amplification of signal from the kinetochores	-0.652	-2.1423	0	0	Down
Antigen activates B Cell Receptor (BCR) leading to generation of second messengers	-0.731	-2.0375	0	0	Down
Assembly of collagen fibrils and other multimeric structures	-0.7341	-2.2295	0	0	Down
Cap-dependent Translation Initiation	0.6023	2.2925	0	0	Up
Chromosome Maintenance	-0.6522	-2.1716	0	0	Down
Collagen biosynthesis and modifying enzymes	-0.7044	-2.2469	0	0	Down
Collagen chain trimerization	-0.7824	-2.4384	0	0	Down
Collagen formation	-0.6622	-2.1841	0	0	Down
DNA methylation	-0.7295	-2.0208	0	0	Down
DNA strand elongation	-0.7127	-2.0218	0	0	Down
Deposition of new CENPA-containing nucleosomes at the centromere	-0.691	-2.1199	0	0	Down
Eukaryotic Translation Elongation	0.6365	2.3297	0	0	Up
Eukaryotic Translation Initiation	0.6023	2.2869	0	0	Up
Eukaryotic Translation Termination	0.6361	2.3148	0	0	Up
Formation of a pool of free 40S subunits	0.6264	2.2182	0	0	Up
Formation of the ternary complex, and subsequently, the 43S complex	0.6089	2.0317	0	0	Up
GTP hydrolysis and joining of the 60S ribosomal subunit	0.6102	2.3902	0	0	Up
Homology Directed Repair	-0.5809	-2.0274	0	0	Down
Immunoregulatory interactions between a Lymphoid and a non-Lymphoid cell	-0.5732	-2.0196	0	0	Down
Interleukin-10 signaling	-0.714	-2.0395	0	0	Down
L13a-mediated translational silencing of Ceruloplasmin expression	0.6149	2.2898	0	0	Up
Major pathway of rRNA processing in the nucleolus and cytosol	0.5244	2.1169	0	0	Up
Meiosis	-0.6038	-2.1212	0	0	Down
Meiotic recombination	-0.6777	-2.0504	0	0	Down
Mitochondrial translation termination	0.5519	2.0371	0	0	Up
Mitotic Prometaphase	-0.5737	-2.0835	0	0	Down
Mitotic Spindle Checkpoint	-0.6175	-2.1132	0	0	Down
Nonsense Mediated Decay (NMD) independent of the Exon Junction Complex (EJC)	0.6023	2.197	0	0	Up
Nonsense-Mediated Decay (NMD)	0.5353	2.0609	0	0	Up
PRC2 methylates histones and DNA	-0.6584	-2.0167	0	0	Down
Peptide chain elongation	0.6284	2.3	0	0	Up
Peptide ligand-binding receptors	-0.5373	-2.0196	0	0	Down
Phosphorylation of CD3 and TCR zeta chains	-0.7231	-2.0473	0	0	Down
RHO GTPases Activate Formins	-0.6027	-2.1949	0	0	Down
Resolution of Sister Chromatid Cohesion	-0.6435	-2.1832	0	0	Down
SRP-dependent cotranslational protein targeting to membrane	0.5582	2.1417	0	0	Up
Selenocysteine synthesis	0.6303	2.2217	0	0	Up
Smooth Muscle Contraction	-0.7715	-2.0638	0	0	Down
TNFs bind their physiological receptors	-0.7762	-2.1179	0	0	Down
Telomere Maintenance	-0.6388	-2.0503	0	0	Down
Translation initiation complex formation	0.5833	2.1703	0	0	Up
Viral mRNA Translation	0.6261	2.2547	0	0	Up
rRNA processing	0.5223	2.1343	0	0	Up
rRNA processing in the nucleus and cytosol	0.5217	2.1416	0	0	Up
Nonsense Mediated Decay (NMD) enhanced by the Exon Junction Complex (EJC)	0.5353	2.017	0	0.000478	Up
Activation of Matrix Metalloproteinases	-0.752	-1.9841	0	0.000656	Down
Nucleosome assembly	-0.691	-1.9875	0	0.000678	Down
Telomere C-strand (Lagging Strand) Synthesis	-0.7018	-2.0011	0	0.0007	Down
Activation of E2F1 target genes at G1/S	-0.8413	-2.0091	0	0.000724	Down
Mitochondrial translation	0.5584	1.9935	0	0.000842	Up
Ribosomal scanning and start codon recognition	0.5791	1.9945	0	0.000881	Up
RUNX1 regulates genes involved in megakaryocyte differentiation and platelet function	-0.6446	-1.9713	0	0.00091	Down
Mitochondrial translation initiation	0.5495	1.9956	0	0.000922	Up
Mitotic Metaphase and Anaphase	-0.5401	-1.9739	0	0.000937	Down
HDR through Homologous Recombination (HRR)	-0.617	-1.9394	0	0.00105	Down
DNA Replication	-0.5568	-1.9395	0	0.00108	Down
Scavenging by Class A Receptors	-0.794	-1.9406	0	0.00111	Down
Chemokine receptors bind chemokines	-0.6718	-1.9509	0	0.00114	Down
G1/S-Specific Transcription	-0.8413	-1.9519	0	0.00117	Down
Mitotic Anaphase	-0.5365	-1.9375	0	0.00127	Down
Binding and Uptake of Ligands by Scavenger Receptors	-0.6744	-1.9256	0	0.0015	Down
DNA Double-Strand Break Repair	-0.5255	-1.9046	0	0.0016	Down
PD-1 signaling	-0.731	-1.9138	0	0.00164	Down
Separation of Sister Chromatids	-0.538	-1.9182	0	0.00167	Down
Senescence-Associated Secretory Phenotype (SASP)	-0.5992	-1.9234	0	0.00171	Down
Synthesis of DNA	-0.5372	-1.8909	0	0.00178	Down
Generation of second messenger molecules	-0.6858	-1.878	0	0.00187	Down
Nitric oxide stimulates guanylate cyclase	-0.715	-1.8817	0	0.00191	Down
Interleukin-4 and Interleukin-13 signaling	-0.5351	-1.8825	0	0.00195	Down
Presynaptic phase of homologous DNA pairing and strand exchange	-0.6512	-1.8759	0	0.002	Down
Costimulation by the CD28 family	-0.5829	-1.8677	0	0.00201	Down
Translocation of ZAP-70 to Immunological synapse	-0.7506	-1.8687	0	0.00204	Down
PCNA-Dependent Long Patch Base Excision Repair	-0.7601	-1.8764	0	0.00204	Down
Initial triggering of complement	-0.7326	-1.8693	0	0.00208	Down
HDR through Homologous Recombination (HRR) or Single Strand Annealing (SSA)	-0.5685	-1.8711	0	0.00212	Down
Meiotic synapsis	-0.5981	-1.8755	0	0.00216	Down
Homologous DNA Pairing and Strand Exchange	-0.6552	-1.8482	0	0.00268	Down
Activation of the mRNA upon binding of the cap-binding complex and eIFs, and subsequent binding to 43S	0.5817	1.9339	0	0.0028	Up
Cell surface interactions at the vascular wall	-0.5171	-1.8342	0	0.00337	Down
Reproduction	-0.537	-1.8351	0	0.00343	Down
Activated PKN1 stimulates transcription of AR (androgen receptor) regulated genes KLK2 and KLK3	-0.6348	-1.8367	0	0.00349	Down
Mitotic G1-G1/S phases	-0.5143	-1.8391	0	0.00355	Down
Synthesis of glycosylphosphatidylinositol (GPI)	0.7338	1.9222	0	0.00386	Up
TNFR2 non-canonical NF-kB pathway	-0.5283	-1.8229	0	0.00441	Down
RNA Polymerase I Promoter Escape	0.6673	1.9059	0	0.00447	Up
G2/M Checkpoints	-0.5199	-1.8229	0	0.00448	Down
Signaling by PDGF	-0.5856	-1.8163	0	0.00498	Down
ERCC6 (CSB) and EHMT2 (G9a) positively regulate rRNA expression	-0.6286	-1.8167	0	0.00506	Down
Condensation of Prophase Chromosomes	-0.6332	-1.8179	0	0.00514	Down
Kinesins	-0.6267	-1.8125	0	0.00514	Down
Gap-filling DNA repair synthesis and ligation in GG-NER	-0.6796	-1.8138	0	0.00521	Down
Mitochondrial translation elongation	0.5402	1.8886	0	0.00574	Up
RNA Polymerase I Transcription Initiation	0.6593	1.8746	0	0.00625	Up
Formation of the beta-catenin:TCF transactivating complex	-0.5559	-1.7944	0	0.00706	Down
TNF receptor superfamily (TNFSF) members mediating non-canonical NF-kB pathway	-0.7068	-1.7952	0	0.00716	Down
Resolution of Abasic Sites (AP sites)	-0.5944	-1.7905	0	0.00752	Down
Collagen degradation	-0.6082	-1.7837	0	0.00785	Down
RNA Polymerase I Promoter Clearance	0.642	1.8454	0	0.00866	Up
Regulation of Insulin-like Growth Factor (IGF) transport and uptake by Insulin-like Growth Factor Binding Proteins (IGFBPs)	-0.5048	-1.7729	0	0.00916	Down
Respiratory electron transport, ATP synthesis by chemiosmotic coupling, and heat production by uncoupling proteins.	0.5171	1.8402	0	0.00938	Up
Glucuronidation	0.6567	1.835	0	0.0094	Up
DNA Replication Pre-Initiation	-0.5426	-1.769	0	0.00959	Down
Cyclin A/B1/B2 associated events during G2/M transition	-0.6734	-1.7682	0	0.00959	Down
SIRT1 negatively regulates rRNA expression	-0.6013	-1.7672	0	0.0096	Down
